# Supplementary material
Source: ML conference proceedings conference paper supplement (https://openreview.net/forum?id=L9pTokEb8L)
Supplement: supplementary_material [file attachment]

## Sheet: webarena
0	[Action Summary] ['None', "click [120] where [120] is link '\\ue60a REPORTS'", "click [597] where [597] is link 'Bestsellers'", "click [2302] where [2302] is combobox 'Period' hasPopup: menu expanded: False", 'press [ArrowDown]', 'press [ArrowDown]', 'press [Enter]', "click [1348] where [1348] is textbox 'From *' required: True", "type [1348] [1/1/22 ] where [1348] is textbox 'From *' focused: Tr…
1	[Action Summary] ['None', "click [120] where [120] is link '\\ue60a REPORTS'", "click [609] where [609] is link 'Bestsellers'", "click [2274] where [2274] is combobox 'Period' hasPopup: menu expanded: False", 'press [ArrowDown]', 'press [Enter]', "click [1334] where [1334] is textbox 'From *' required: True", "type [1334] [1/1/22 ] where [1334] is textbox 'From *' focused: True required: True", "…
2	[Action Summary] ['None', "click [120] where [120] is link '\\ue60a REPORTS'", "click [597] where [597] is link 'Bestsellers'", "click [2302] where [2302] is combobox 'Period' hasPopup: menu expanded: False", 'press [ArrowDown]', 'press [Enter]', "click [1348] where [1348] is textbox 'From *' required: True", "type [1348] [1/1/22 ] where [1348] is textbox 'From *' focused: True required: True", "…
3	[Action Summary] ['None', "click [120] where [120] is link '\\ue60a REPORTS'", 'stop [Sprite Stasis Ball 65 cm, Quest Lumaflex Band]']
7	[Action Summary] ['None', "click [35] where [35] is textbox 'Search' focused: True required: False", "type [35] [airport Pittsburgh ] where [35] is textbox 'Search' focused: True required: False", 'stop [Pittsburgh International Airport, Airport Boulevard, Findlay Township, Allegheny County, 15231, United States.]']
8	[Action Summary] ['None', "click [12] where [12] is textbox 'Search' focused: True required: False", "type [12] [airport Pittsburgh ] where [12] is textbox 'Search' focused: True required: False", "click [495] where [495] is button 'Go'", "click [640] where [640] is link 'Pittsburgh International Airport People Movers, Airport Boulevard, Findlay Township, Allegheny County, 15231, United States'",…
9	[Action Summary] ['None', "click [35] where [35] is textbox 'Search' focused: True required: False", "type [35] [airport Pittsburgh ] where [35] is textbox 'Search' focused: True required: False", 'stop [Pittsburgh International Airport People Movers, Airport Boulevard, Findlay Township, Allegheny County, 15231, United States; Pittsburgh International Airport Landside Terminal, 1000, Airport Boul…
11	[Action Summary] ['None', "click [108] where [108] is link '\\ue609 MARKETING'", "click [419] where [419] is link 'All Reviews'", "click [2195] where [2195] is button 'Reset Filter'", "type [4428] [disappointed ] where [4428] is textbox '' required: False", "click [5907] where [5907] is button 'Search'", 'stop [6]']
12	[Action Summary] ['None', "click [108] where [108] is link '\\ue609 MARKETING'", "click [419] where [419] is link 'All Reviews'", "type [2222] [satisfied ] where [2222] is columnheader 'Review' required: False", 'scroll [down]', 'scroll [down]', 'scroll [down]', 'scroll [up3]', "click [4050] where [4050] is button 'Search'", 'scroll [down]', 'scroll [down]', 'stop [2]']
13	[Action Summary] ['None', "click [108] where [108] is link '\\ue609 MARKETING'", "click [419] where [419] is link 'All Reviews'", "type [2233] [decent ] where [2233] is gridcell '' required: False", 'stop [2]']
14	[Action Summary] ['None', "click [108] where [108] is link '\\ue609 MARKETING'", "click [419] where [419] is link 'All Reviews'", "type [2233] [not useful ] where [2233] is gridcell '' required: False", "click [4051] where [4051] is button 'Search'", 'stop [0]']
15	[Action Summary] ['None', "click [108] where [108] is link '\\ue609 MARKETING'", "click [419] where [419] is link 'All Reviews'", "click [2194] where [2194] is button 'Search'", 'scroll [down]', "type [4089] [best ] where [4089] is gridcell '' required: False", "click [4050] where [4050] is button 'Search'", 'stop [2]']
16	[Action Summary] ['None', "click [482] where [482] is link 'Find directions between two points'", "type [522] [5000 Fifth Avenue, Pittsburgh ] where [522] is textbox 'From' required: False", "type [514] [UPMC family health center ] where [514] is textbox 'To' required: False", "click [503] where [503] is combobox '' hasPopup: menu expanded: False", "click [544] where [544] is menuitem 'Car (OSRM)…
17	[Action Summary] ['None', "click [482] where [482] is link 'Find directions between two points'", "type [522] [AMC Waterfront ] where [522] is textbox 'From' required: False", "type [514] [Carnegie Mellon University ] where [514] is textbox 'To' required: False", "click [505] where [505] is button 'Go'", 'scroll [down]', 'scroll [down]', "click [503] where [503] is combobox '' hasPopup: menu expa…
18	[Action Summary] ['None', "click [482] where [482] is link 'Find directions between two points'", "click [522] where [522] is textbox 'From' required: False", "type [522] [AMC Waterfront ] where [522] is textbox 'From' focused: True required: False", "click [505] where [505] is button 'Go'", "click [514] where [514] is textbox 'To' required: False", "type [514] [University of Pittsburgh ] where […
19	[Action Summary] ['None', "click [482] where [482] is link 'Find directions between two points'", "type [522] [Carnegie Science Center, Pittsburgh ] where [522] is textbox 'From' required: False", "type [514] [Carnegie Mellon University, Pittsburgh ] where [514] is textbox 'To' required: False", "click [505] where [505] is button 'Go'", 'scroll [down]', "click [503] where [503] is combobox '' has…
20	[Action Summary] ['None', "click [482] where [482] is link 'Find directions between two points'", "click [522] where [522] is textbox 'From' required: False", "type [522] [Randyland Pittsburgh ] where [522] is textbox 'From' focused: True required: False", "click [514] where [514] is textbox 'To' required: False", "type [514] [Carnegie Mellon University Pittsburgh ] where [514] is textbox 'To' fo…
21	[Action Summary] ['None', 'scroll [down]', "click [1352] where [1352] is link 'Reviews (12)'", 'stop [Joseph Brzezinski, Catso, Dibbins, Michelle Davis]']
22	[Action Summary] ['None', 'scroll [down]', "click [1354] where [1354] is link 'Reviews (12)'", "stop [n/a, there's no item matching the requirement]"]
22	[Action Summary] ['None', 'scroll [down]', "click [1354] where [1354] is link 'Reviews (12)'", "stop [n/a, there's no item matching the requirement]"]
23	[Action Summary] ['None', 'scroll [down]', "click [1351] where [1351] is link 'Reviews (12)'", 'stop [Rachel and T. Gannon]']
24	[Action Summary] ['None', 'scroll [down]', "click [1349] where [1349] is link 'Reviews (2)'", "stop [n/a, there's no item matching the requirement]"
25	[Action Summary] ['None', 'scroll [down]', "click [1390] where [1390] is link 'Reviews (12)'", 'stop [Goldfish, Roxanne Brandon Coffey]']
26	[Action Summary] ['None', 'scroll [down]', "click [1390] where [1390] is link 'Reviews (12)'", 'stop [Bob in Vegas, RemyR]']
27	[Action Summary] ['None', "click [65] where [65] is link 'Forums'", 'scroll [down2]', "click [522] where [522] is link 'Showerthoughts — Showerthoughts'", "click [1217] where [1217] is button 'Sort by: Hot' hasPopup: menu expanded: False", "click [2960] where [2960] is link 'New'", "click [3648] where [3648] is link 'It is more acceptable for men to walk around the house with only pants on than i…
28	[Action Summary] ['None', "click [65] where [65] is link 'Forums'", 'scroll [down3]', "click [981] where [981] is link 'Next'", 'scroll [down3]', "click [1939] where [1939] is link 'Next'", 'scroll [down2]', "click [2468] where [2468] is link 'WorcesterMA — WorcesterMA'", "click [3138] where [3138] is button 'Sort by: Hot' hasPopup: menu expanded: False", "click [4919] where [4919] is link 'New'"…
30	[Action Summary] ['None', "click [65] where [65] is link 'Forums'", 'scroll [down3]', "click [632] where [632] is link 'space — space'", "click [1222] where [1222] is button 'Sort by: Hot' hasPopup: menu expanded: False", "click [3010] where [3010] is link 'New'", "click [3048] where [3048] is HeaderAsNonLandmark ''", "click [3289] where [3289] is heading 'Scientists erupt at NASA gutting funding…
30	[Action Summary] ['None', "click [65] where [65] is link 'Forums'", 'scroll [down3]', "click [632] where [632] is link 'space — space'", "click [1222] where [1222] is button 'Sort by: Hot' hasPopup: menu expanded: False", "click [3010] where [3010] is link 'New'", "click [3048] where [3048] is HeaderAsNonLandmark ''", "click [3289] where [3289] is heading 'Scientists erupt at NASA gutting funding…
31	[Action Summary] ['None', "click [65] where [65] is link 'Forums'", 'go_back', "click [1381] where [1381] is link 'Comments'", "click [1459] where [1459] is heading '[deleted] [t1_jeh5mkt] wrote 1 year ago'", 'press [Enter]', 'go_back', "click [3855] where [3855] is link 'Forums'", 'go_back', "click [5001] where [5001] is button 'MarvelsGrantMan136' hasPopup: menu expanded: False", "click [5259] …
36	[Action Summary] ['None', "click [482] where [482] is link 'Find directions between two points'", "type [522] [Carnegie Mellon University ] where [522] is textbox 'From' required: False", "type [514] [social security administration pittsburgh ] where [514] is textbox 'To' required: False", 'stop [Yes]']
38	[Action Summary] ['None', "click [482] where [482] is link 'Find directions between two points'", "type [522] [Pittsburgh Airport ] where [522] is textbox 'From' required: False", "type [514] [Duquesne University, Pittsburgh ] where [514] is textbox 'To' required: False", 'stop [Yes]']
39	[Action Summary] ['None', "click [482] where [482] is link 'Find directions between two points'", "type [522] [5600 Fifth Avenue, Pittsburgh ] where [522] is textbox 'From' required: False", "type [514] [Walmart Pittsburgh ] where [514] is textbox 'To' required: False", 'stop [Yes]']
41	[Action Summary] ['None', "click [120] where [120] is link '\\ue60a REPORTS'", "click [502] where [502] is link 'Search Terms'", "click [2036] where [2036] is button 'Search'", 'stop [hollister]']
42	[Action Summary] ['None', "click [120] where [120] is link '\\ue60a REPORTS'", "click [502] where [502] is link 'Search Terms'", 'stop [hollister, Joust Bag]']
42	[Action Summary] ['None', "click [120] where [120] is link '\\ue60a REPORTS'", "click [502] where [502] is link 'Search Terms'", 'stop [hollister, Joust Bag]']
43	[Action Summary] ['None', "click [120] where [120] is link '\\ue60a REPORTS'", "click [502] where [502] is link 'Search Terms'", "click [2037] where [2037] is button 'Reset Filter'", 'stop [hollister, Joust Bag, nike, Antonia Racer Tank]']
44	[Action Summary] ['None', "click [406] where [406] is link 'To-Do List'", 'stop [.]']
45	[Action Summary] ['None', "click [495] where [495] is link 'Issues'", "click [2873] where [2873] is button 'Created date' hasPopup: menu expanded: False", "click [5107] where [5107] is menuitem 'Created date'", "click [2753] where [2753] is button 'Sort direction: Ascending'", 'stop []']
45	[Action Summary] ['None', "click [495] where [495] is link 'Issues'", "click [2873] where [2873] is button 'Created date' hasPopup: menu expanded: False", "click [5107] where [5107] is menuitem 'Created date'", "click [2753] where [2753] is button 'Sort direction: Ascending'", 'stop []']
46	[Action Summary] ['None', "click [468] where [468] is link 'Issues'", "click [2507] where [2507] is button 'Created date' hasPopup: menu expanded: False", 'press [Enter]', "click [4495] where [4495] is menuitem 'Updated date'", 'press [Enter]', 'go_back', 'stop []']
47	[Action Summary] ['None', "click [1261] where [1261] is link 'My Account'", "click [4220] where [4220] is link 'My Orders'", 'scroll [down]', "click [6370] where [6370] is combobox '' hasPopup: menu expanded: False", 'press [PageDown]', 'press [PageDown]', 'press [Enter]', "stop [n/a, there's no item matching the requirement]"]
48	[Action Summary] ['None', "click [1256] where [1256] is link 'My Account'", "click [4165] where [4165] is link 'My Orders'", "stop [n/a, there's no item matching the requirement]"]
48	[Action Summary] ['None', "click [1256] where [1256] is link 'My Account'", "click [4165] where [4165] is link 'My Orders'", "stop [n/a, there's no item matching the requirement]"]
49	[Action Summary] ['None', "click [1256] where [1256] is link 'My Account'", "click [4165] where [4165] is link 'My Orders'", 'scroll [down]', "click [6287] where [6287] is combobox '' hasPopup: menu expanded: False", 'stop [3 orders fulfilled, $845.49 spent.]']
53	[Action Summary] ['None', "click [482] where [482] is link 'Find directions between two points'", "click [522] where [522] is textbox 'From' required: False", "type [522] [University of Pittsburgh ] where [522] is textbox 'From' focused: True required: False", "click [514] where [514] is textbox 'To' required: False", "type [514] [starbucks, Craig Street ] where [514] is textbox 'To' focused: Tru…
53	[Action Summary] ['None', "click [482] where [482] is link 'Find directions between two points'", "click [522] where [522] is textbox 'From' required: False", "type [522] [University of Pittsburgh ] where [522] is textbox 'From' focused: True required: False", "click [514] where [514] is textbox 'To' required: False", "type [514] [starbucks, Craig Street ] where [514] is textbox 'To' focused: Tru…
54	[Action Summary] ['None', "click [482] where [482] is link 'Find directions between two points'", "click [522] where [522] is textbox 'From' required: False", "type [522] [Carnegie Mellon University ] where [522] is textbox 'From' focused: True required: False", "click [514] where [514] is textbox 'To' required: False", "type [514] [Univ of Pittsburgh ] where [514] is textbox 'To' focused: True r…
65	[Action Summary] ['None', "click [90] where [90] is link '\\ue60b SALES'", "click [283] where [283] is link 'Orders'", "click [2307] where [2307] is button '\\ue605Filters'", "click [2788] where [2788] is button 'Clear all'", "type [3184] [1/1/16 ] where [3184] is textbox 'from' required: False", "type [3143] [12/31/24 ] where [3143] is textbox 'to' required: False", "click [3177] where [3177] is…
66	[Action Summary] ['None', "click [65] where [65] is link 'Forums'", 'scroll [down3]', "click [592] where [592] is link 'books — books'", 'stop [[https://www.postmill.xyz/f/books?postid=t3_ydeu5t, https://www.postmill.xyz/f/books?postid=t3_zs60at]]']
67	[Action Summary] ['None', "click [65] where [65] is link 'Forums'", 'scroll [down3]', "click [592] where [592] is link 'books — books'", "click [1222] where [1222] is button 'Sort by: Hot' hasPopup: menu expanded: False", "click [2999] where [2999] is link 'Top'", "click [3031] where [3031] is button 'From: Past 24 hours' hasPopup: menu expanded: False", "click [3322] where [3322] is link 'Past y…
68	[Action Summary] ['None', "click [65] where [65] is link 'Forums'", 'scroll [down3]', "click [592] where [592] is link 'books — books'", 'stop [The Hobbit by J.R.R. Tolkien, A Christmas Carol by Charles Dickens]']
69	[Action Summary] ['None', "click [33] where [33] is link 'Home'", "click [306] where [306] is link 'Forums'", 'scroll [down3]', "click [833] where [833] is link 'books — books'", 'stop [bookshop.org]']
70	[Action Summary] ['None', "click [35] where [35] is textbox 'Search' focused: True required: False", "type [35] [Carnegie Mellon University Pittsburgh ] where [35] is textbox 'Search' focused: True required: False", 'stop [15213]']
71	[Action Summary] ['None', "click [12] where [12] is textbox 'Search' focused: True required: False", "type [12] [Chatham University ] where [12] is textbox 'Search' focused: True required: False", 'stop [15232]']
71	[Action Summary] ['None', "click [12] where [12] is textbox 'Search' focused: True required: False", "type [12] [Chatham University ] where [12] is textbox 'Search' focused: True required: False", 'stop [15232]']
72	[Action Summary] ['None', "click [35] where [35] is textbox 'Search' focused: True required: False", "type [35] [Yale University ] where [35] is textbox 'Search' focused: True required: False", 'stop [06516]']
73	[Action Summary] ['None', "click [12] where [12] is textbox 'Search' focused: True required: False", "type [12] [Columbia University, New York ] where [12] is textbox 'Search' focused: True required: False", 'stop [10027]']
79	[Action Summary] ['None', "click [108] where [108] is link '\\ue609 MARKETING'", "click [431] where [431] is link 'All Reviews'", "click [2168] where [2168] is button 'Search'", "click [4381] where [4381] is combobox '' hasPopup: menu expanded: False", "click [4851] where [4851] is menuitem 'Not Approved' selected: False", 'scroll [down]', 'scroll [down]', 'scroll [down]', 'scroll [down]', 'scrol…
84	[Action Summary] ['None', "click [482] where [482] is link 'Find directions between two points'", "type [522] [DoubleTree by Hilton New York Downtown ] where [522] is textbox 'From' required: False", "type [514] [Keens Steakhouse ] where [514] is textbox 'To' required: False", 'stop [estimated driving time is 0:14.]']
87	[Action Summary] ['None', "click [482] where [482] is link 'Find directions between two points'", "type [522] [Red Roof Inn Pittsburgh ] where [522] is textbox 'From' required: False", "type [514] [Carnegie Science Center Pittsburgh ] where [514] is textbox 'To' required: False", 'stop [0:20]']
88	[Action Summary] ['None', "click [482] where [482] is link 'Find directions between two points'", "type [522] [Homewood Suites Southpointe ] where [522] is textbox 'From' required: False", "type [514] [PPG Paints Arena ] where [514] is textbox 'To' required: False", 'stop [0:34]']
89	[Action Summary] ['None', "click [12] where [12] is textbox 'Search' focused: True required: False", "type [12] [Connecticut ] where [12] is textbox 'Search' focused: True required: False", "click [580] where [580] is link 'Connecticut, United States'", "click [23] where [23] is generic 'Zoom In Zoom Out Show My Location Layers Share 20 km 10 mi © OpenStreetMap contributors ♥ Make a Donation. Web…
90	[Action Summary] ['None', "click [12] where [12] is textbox 'Search' focused: True required: False", "type [12] [Pennsylvania ] where [12] is textbox 'Search' focused: True required: False", "click [568] where [568] is link 'Pennsylvania, United States'", "click [28] where [28] is link 'Zoom Out'", "click [28] where [28] is link 'Zoom Out' focused: True describedby: tooltip400130", 'stop [New Yor…
90	[Action Summary] ['None', "click [12] where [12] is textbox 'Search' focused: True required: False", "type [12] [Pennsylvania ] where [12] is textbox 'Search' focused: True required: False", "click [568] where [568] is link 'Pennsylvania, United States'", "click [28] where [28] is link 'Zoom Out'", "click [28] where [28] is link 'Zoom Out' focused: True describedby: tooltip400130", 'stop [New Yor…
91	[Action Summary] ['None', "click [35] where [35] is textbox 'Search' focused: True required: False", "type [35] [Massachusetts ] where [35] is textbox 'Search' focused: True required: False", "click [576] where [576] is link 'Massachusetts, United States'", "click [20] where [20] is link 'Zoom Out'", 'stop [Vermont, New Hampshire, New York, Connecticut, Rhode Island]']
94	[Action Summary] ['None', "click [90] where [90] is link '\\ue60b SALES'", "click [286] where [286] is link 'Invoices'", 'stop [$36.39]']
95	[Action Summary] ['None', "click [90] where [90] is link '\\ue60b SALES'", "click [298] where [298] is link 'Invoices'", 'stop [$39.64]']
95	[Action Summary] ['None', "click [90] where [90] is link '\\ue60b SALES'", "click [298] where [298] is link 'Invoices'", 'stop [$39.64]']
96	[Action Summary] ['None', "click [1257] where [1257] is link 'My Account'", 'stop [Status: Canceled, Estimated Delivery Date: n/a]']
97	[Action Summary] ['None', "click [482] where [482] is link 'Find directions between two points'", "click [522] where [522] is textbox 'From' required: False", "type [522] [Carnegie Mellon University ] where [522] is textbox 'From' focused: True required: False", "click [514] where [514] is textbox 'To' required: False", "type [514] [Massachusetts Institute of Technology ] where [514] is textbox '…
101	[Action Summary] ['None', "click [482] where [482] is link 'Find directions between two points'", "type [522] [University of Pittsburgh ] where [522] is textbox 'From' required: False", "type [514] [In-N-Out Upitts ] where [514] is textbox 'To' required: False", "click [505] where [505] is button 'Go'", "click [503] where [503] is combobox '' hasPopup: menu expanded: False", 'press [PageDown]', '…
102	[Action Summary] ['None', "click [542] where [542] is link 'The A11Y Project / a11yproject.com'", "click [2008] where [2008] is link 'Issues'", "click [6310] where [6310] is link 'help wanted'", 'stop []']
105	[Action Summary] ['None', "click [1507] where [1507] is textbox 'Search GitLab' required: False", "type [1516] [openapi-generator ] where [1516] is searchbox 'Search GitLab' focused: True describedby: search-input-description", "click [2085] where [2085] is link 'OpenAPI Tools / openapi-generator'", "click [3753] where [3753] is link 'Issues'", "click [11178] where [11178] is button 'Created date…
107	[Action Summary] ['None', "click [120] where [120] is link '\\ue60a REPORTS'", "click [539] where [539] is link 'Orders'", "click [2340] where [2340] is combobox 'Period' hasPopup: menu expanded: False", 'press [ArrowDown]', 'press [Enter]', "click [1372] where [1372] is textbox 'From *' required: True", "type [1372] [5/1/22 ] where [1372] is textbox 'From *' focused: True required: True", "type …
113	[Action Summary] ['None', "click [108] where [108] is link '\\ue609 MARKETING'", "click [431] where [431] is link 'All Reviews'", "click [2169] where [2169] is button 'Reset Filter'", 'scroll [down]', "type [4386] [Olivia zip jacket ] where [4386] is textbox '' required: False", 'scroll [down]', 'stop [Emma, Seam Miller]']
114	[Action Summary] ['None', "click [108] where [108] is link '\\ue609 MARKETING'", "click [431] where [431] is link 'All Reviews'", "click [2169] where [2169] is button 'Reset Filter'", "type [4393] [Antonia Racer Tank ] where [4393] is textbox '' required: False", 'stop [Merrie; Shaunte]']
115	[Action Summary] ['None', "click [108] where [108] is link '\\ue609 MARKETING'", "click [431] where [431] is link 'All Reviews'", "click [2169] where [2169] is button 'Reset Filter'", "type [4386] [Chloe tank ] where [4386] is textbox '' required: False", "stop [n/a, there's no item matching the requirement]"]
115	[Action Summary] ['None', "click [108] where [108] is link '\\ue609 MARKETING'", "click [431] where [431] is link 'All Reviews'", "click [2169] where [2169] is button 'Reset Filter'", "type [4386] [Chloe tank ] where [4386] is textbox '' required: False", "stop [n/a, there's no item matching the requirement]"]
116	[Action Summary] ['None', "click [108] where [108] is link '\\ue609 MARKETING'", "click [419] where [419] is link 'All Reviews'", "click [2595] where [2595] is textbox '' required: False", 'type [2595] ["" ] where [2595] is textbox \'\' focused: True required: False', "type [4202] [tank ] where [4202] is textbox '' required: False", 'stop [Merrie, Shaunte, Teofila, Valorie, Yan, Monroe, Alexander…
117	[Action Summary] ['None', "click [1256] where [1256] is link 'My Account'", "click [4211] where [4211] is link 'My Orders'", 'scroll [down]', "click [6361] where [6361] is combobox '' hasPopup: menu expanded: False", 'press [PageDown]', 'press [PageDown]', 'press [Enter]', 'stop [3/2/22]']
117	[Action Summary] ['None', "click [1256] where [1256] is link 'My Account'", "click [4211] where [4211] is link 'My Orders'", 'scroll [down]', "click [6361] where [6361] is combobox '' hasPopup: menu expanded: False", 'press [PageDown]', 'press [PageDown]', 'press [Enter]', 'stop [3/2/22]']
118	[Action Summary] ['None', "click [900] where [900] is menuitem '\\ue622 Health & Household' hasPopup: menu", "click [4070] where [4070] is combobox '\\ue615 Search' autocomplete: both hasPopup: listbox required: False expanded: False", "type [4070] [bruxism ] where [4070] is combobox '\\ue615 Search' focused: True autocomplete: both hasPopup: listbox required: False expanded: True", 'scroll [down…
120	the student's answer includes "comfortable," which matches the reference answer. however, the additional phrases "lightweight" and "good shoes" are not relevant to the question about the "ana running short," which is presumably a piece of clothing and not shoes. the student's answer is partially correct because it includes the correct reason but also adds unrelated information.
121	[Action Summary] ['None', "click [96] where [96] is link '\\ue608 CATALOG'", "click [317] where [317] is link 'Products'", "click [2578] where [2578] is link 'Magento Admin Panel'", "click [8950] where [8950] is link '\\ue608 CATALOG'", "click [9171] where [9171] is link 'Products'", 'scroll [down]', "click [12133] where [12133] is textbox '\\ue60c' required: False", "type [12133] [Circe hooded f…
123	[Action Summary] ['None', "click [108] where [108] is link '\\ue609 MARKETING'", "click [419] where [419] is link 'All Reviews'", "click [2195] where [2195] is button 'Reset Filter'", "type [4435] [Circe ] where [4435] is textbox '' required: False", "click [6067] where [6067] is link 'Edit'", 'stop [The fleece material is incredibly soft and cozy, the addition of the hood provides extra warmth, …
126	[Action Summary] ['None', "click [1585] where [1585] is combobox '\\ue615 Search' autocomplete: both hasPopup: listbox required: False expanded: False", "type [1585] [Canon photo printer ] where [1585] is combobox '\\ue615 Search' focused: True autocomplete: both hasPopup: listbox required: False expanded: True", "click [4084] where [4084] is button 'Search' disabled: True", 'stop [$2.56 to $649.…
127	[Action Summary] ['None', "click [108] where [108] is link '\\ue609 MARKETING'", "click [403] where [403] is link 'Search Terms'", "click [2035] where [2035] is button 'Reset Filter'", 'type [3191] ["" ] where [3191] is textbox \'\\ue60c\' required: False', "click [3526] where [3526] is button 'Search'", 'stop [["Joust Bag", "MT02-M-Gray", "WP10", "hollister", "Antonia Racer Tank", "nike", "tanks…
132	[Action Summary] ['None', "click [1507] where [1507] is textbox 'Search GitLab' required: False", "type [1516] [a11yproject ] where [1516] is searchbox 'Search GitLab' focused: True describedby: search-input-description", "click [2084] where [2084] is link 'The A11Y Project / a11yproject.com'", "click [2681] where [2681] is link 'Project information'", "click [5633] where [5633] is link 'Reposito…
133	[Action Summary] ['None', "click [1507] where [1507] is textbox 'Search GitLab' required: False", "type [1516] [a11yproject ] where [1516] is searchbox 'Search GitLab' focused: True describedby: search-input-description", "click [2086] where [2086] is link 'The A11Y Project / a11yproject.com'", "click [2701] where [2701] is link 'Monitor'", "click [4944] where [4944] is listitem 'a11yproject.com'…
133	[Action Summary] ['None', "click [1507] where [1507] is textbox 'Search GitLab' required: False", "type [1516] [a11yproject ] where [1516] is searchbox 'Search GitLab' focused: True describedby: search-input-description", "click [2086] where [2086] is link 'The A11Y Project / a11yproject.com'", "click [2701] where [2701] is link 'Monitor'", "click [4944] where [4944] is listitem 'a11yproject.com'…
135	[Action Summary] ['None', "click [1507] where [1507] is textbox 'Search GitLab' required: False", "type [1516] [a11yproject ] where [1516] is searchbox 'Search GitLab' focused: True describedby: search-input-description", "click [2086] where [2086] is link 'The A11Y Project / a11yproject.com'", "click [2824] where [2824] is link '2,320 Commits'", 'stop [1]']
136	[Action Summary] ['None', "type [1507] [a11y-webring.club ] where [1507] is textbox 'Search GitLab' required: False", "click [2037] where [2037] is link 'Byte Blaze / a11y-webring.club'", "click [2616] where [2616] is link 'Repository'", "click [5659] where [5659] is link 'Commits'", 'press [Enter]', 'stop [5]']
140	[Action Summary] ['None', "click [482] where [482] is link 'Find directions between two points'", "click [522] where [522] is textbox 'From' required: False", "type [522] [Niagara Falls ] where [522] is textbox 'From' focused: True required: False", "click [514] where [514] is textbox 'To' required: False", "type [514] [Yale University ] where [514] is textbox 'To' focused: True required: False",…
144	[Action Summary] ['None', "click [1256] where [1256] is link 'My Account'", "click [4211] where [4211] is link 'My Orders'", 'press [PageDown]', 'press [PageDown]', 'press [Enter]', "stop [n/a, there's no item matching the requirement.]"]
150	[Action Summary] ['None', "click [1256] where [1256] is link 'My Account'", "click [4211] where [4211] is link 'My Orders'", 'scroll [down]', "click [6361] where [6361] is combobox '' hasPopup: menu expanded: False", 'press [PageDown]', 'press [PageDown]', 'press [Enter]', 'scroll [down]', "click [9044] where [9044] is link 'View Order'", 'go_back', "click [14018] where [14018] is link 'View Orde…
151	[Action Summary] ['None', "click [482] where [482] is link 'Find directions between two points'", "type [522] [Carnegie Mellon University ] where [522] is textbox 'From' required: False", "type [514] [University of Pittsburgh ] where [514] is textbox 'To' required: False", 'stop [Time: 0:04]']
152	[Action Summary] ['None', "click [482] where [482] is link 'Find directions between two points'", "click [522] where [522] is textbox 'From' required: False", "type [522] [Schenley Park ] where [522] is textbox 'From' focused: True required: False", "click [514] where [514] is textbox 'To' required: False", "type [514] [University of Pittsburgh ] where [514] is textbox 'To' focused: True required…
152	[Action Summary] ['None', "click [482] where [482] is link 'Find directions between two points'", "click [522] where [522] is textbox 'From' required: False", "type [522] [Schenley Park ] where [522] is textbox 'From' focused: True required: False", "click [514] where [514] is textbox 'To' required: False", "type [514] [University of Pittsburgh ] where [514] is textbox 'To' focused: True required…
153	[Action Summary] ['None', "click [482] where [482] is link 'Find directions between two points'", "click [522] where [522] is textbox 'From' required: False", "type [522] [REI ] where [522] is textbox 'From' focused: True required: False", "click [514] where [514] is textbox 'To' required: False", "type [514] [Carnegie Mellon University ] where [514] is textbox 'To' focused: True required: False"…
155	[Action Summary] ['None', "click [482] where [482] is link 'Find directions between two points'", "click [522] where [522] is textbox 'From' required: False", "type [522] [Animal Rescue League of Pittsburgh ] where [522] is textbox 'From' focused: True required: False", "click [514] where [514] is textbox 'To' required: False", "type [514] [Schenley park ] where [514] is textbox 'To' focused: Tru…
156	[Action Summary] ['None', "click [404] where [404] is link 'Merge requests'", "click [1516] where [1516] is link 'Assigned to you 3'", "click [1775] where [1775] is link 'Open 3'", "click [2859] where [2859] is link 'Closed 0'", "click [3718] where [3718] is button 'Assignee = Byte Blaze'", "click [3974] where [3974] is button 'Recent searches'", "click [4860] where [4860] is button 'assignee: = …
156	[Action Summary] ['None', "click [404] where [404] is link 'Merge requests'", "click [1516] where [1516] is link 'Assigned to you 3'", "click [1775] where [1775] is link 'Open 3'", "click [2859] where [2859] is link 'Closed 0'", "click [3718] where [3718] is button 'Assignee = Byte Blaze'", "click [3974] where [3974] is button 'Recent searches'", "click [4860] where [4860] is button 'assignee: = …
157	[Action Summary] ['None', "click [102] where [102] is link '\\ue603 CUSTOMERS'", "click [332] where [332] is link 'All Customers'", "click [2747] where [2747] is button '\\ue610 Columns'", "click [3179] where [3179] is checkbox 'ID' checked: false", "click [3142] where [3142] is checkbox '\\ue62d Name' checked: true", "click [3178] where [3178] is checkbox 'Email' checked: false", "click [3142] w…
158	[Action Summary] ['None', "click [2430] where [2430] is link 'Advanced Search'", "click [3975] where [3975] is combobox '\\ue615 Search' autocomplete: both hasPopup: listbox required: False expanded: False", "type [3975] [Nintendo Switch game card storage ] where [3975] is combobox '\\ue615 Search' focused: True autocomplete: both hasPopup: listbox required: False expanded: True", "click [6156] w…
158	[Action Summary] ['None', "click [2430] where [2430] is link 'Advanced Search'", "click [3975] where [3975] is combobox '\\ue615 Search' autocomplete: both hasPopup: listbox required: False expanded: False", "type [3975] [Nintendo Switch game card storage ] where [3975] is combobox '\\ue615 Search' focused: True autocomplete: both hasPopup: listbox required: False expanded: True", "click [6156] w…
159	[Action Summary] ['None', "click [987] where [987] is menuitem '\\ue622 Video Games' hasPopup: menu", "click [3621] where [3621] is menuitem '\\ue622 Video Games' hasPopup: menu", "click [6405] where [6405] is menuitem '\\ue622 Video Games' hasPopup: menu", "click [9189] where [9189] is menuitem '\\ue622 Video Games' hasPopup: menu", "click [11973] where [11973] is menuitem '\\ue622 Video Games' …
162	[Action Summary] ['None', "click [1585] where [1585] is combobox '\\ue615 Search' autocomplete: both hasPopup: listbox required: False expanded: False", "type [1585] [Nintendo Switch game card storage ] where [1585] is combobox '\\ue615 Search' focused: True autocomplete: both hasPopup: listbox required: False expanded: True", "click [4083] where [4083] is button 'Search' disabled: True", "click …
162	[Action Summary] ['None', "click [1585] where [1585] is combobox '\\ue615 Search' autocomplete: both hasPopup: listbox required: False expanded: False", "type [1585] [Nintendo Switch game card storage ] where [1585] is combobox '\\ue615 Search' focused: True autocomplete: both hasPopup: listbox required: False expanded: True", "click [4083] where [4083] is button 'Search' disabled: True", "click …
163	[Action Summary] ['None', "click [1332] where [1332] is link '12\\xa0 Reviews '", 'stop ["The memory card that came is indeed a real Sony memory card. I ordered the 16gb but I only got 14 gigs even though I formatted the card. The memory card is kind of slow on games and downloads. Though not shown in the picture, this is an actual PS VITA memory card. It\'s used and the previous owners data has …
164	[Action Summary] ['None', 'scroll [down]', "click [1344] where [1344] is link 'Reviews (3)'", 'stop ["Those labial never came to me and I would like them again because I paid for them", "Dry", "Uneven color"]']
165	[Action Summary] ['None', 'scroll [down]', "click [1366] where [1366] is link 'Reviews (4)'", 'stop [Criticisms include: Size inconsistency (too small or too big), discomfort due to shoe fit (tightness and stiffness), and specific issues with the strap causing pain and the shoe rubbing against toes.]']
165	[Action Summary] ['None', 'scroll [down]', "click [1366] where [1366] is link 'Reviews (4)'", 'stop [Criticisms include: Size inconsistency (too small or too big), discomfort due to shoe fit (tightness and stiffness), and specific issues with the strap causing pain and the shoe rubbing against toes.]']
167	[Action Summary] ['None', 'scroll [down]', "click [1339] where [1339] is link 'Reviews (2)'", 'stop ["The wireless connection works on a whim (about 40% of the time I\'ve owned it). It seems to constantly run out of ink. This printer seems to have more reasons NOT to work (none that are findable or correctable) Ex: error boxes saying that it\'s out of paper when it automatically switches to photo…
168	[Action Summary] ['None', "click [459] where [459] is link 'Personal'", 'stop [no repositories have more than 100 stars.]']
170	[Action Summary] ['None', "click [459] where [459] is link 'Personal'", "click [1864] where [1864] is button 'Name'", "click [2918] where [2918] is link 'Name, descending'", "stop [[repositories with the least stars are 'Byte Blaze / timeit', 'Byte Blaze / solarized-prism-theme', 'Byte Blaze / remove-board-movement-events-from-the-github-issue-timeline', 'Byte Blaze / gimmiethat.space', 'Byte Bla…
171	[Action Summary] ['None', "click [459] where [459] is link 'Personal'", 'stop [Byte Blaze / a11y-syntax-highlighting, Byte Blaze / a11y-webring.club, Byte Blaze / accessible-html-content-patterns, Byte Blaze / cloud-to-butt, Byte Blaze / dotfiles, Byte Blaze / ericwbailey.website, Byte Blaze / gimmiethat.space, Byte Blaze / remove-board-movement-events-from-the-github-issue-timeline, Byte Blaze /…
172	[Action Summary] ['None', "click [459] where [459] is link 'Personal'", 'stop [Byte Blaze / a11y-syntax-highlighting, Byte Blaze / a11y-webring.club, Byte Blaze / accessible-html-content-patterns, Byte Blaze / cloud-to-butt, Byte Blaze / dotfiles, Byte Blaze / ericwbailey.website, Byte Blaze / gimmiethat.space, Byte Blaze / solarized-prism-theme, Byte Blaze / timeit]']
173	[Action Summary] ['None', "click [403] where [403] is link 'Issues'", "click [1958] where [1958] is button 'Created date' hasPopup: listbox", 'press [Enter]', "click [1958] where [1958] is button 'Created date' focused: True hasPopup: listbox", "click [3239] where [3239] is option 'Updated date' selected: False", "click [3712] where [3712] is link 'Sort direction'", "click [5187] where [5187] is …
174	[Action Summary] ['None', "click [403] where [403] is link 'Issues'", "click [1872] where [1872] is link 'Sort direction'", 'press [Enter]', "click [3336] where [3336] is link 'Closed 53'", "type [6227] [feature ] where [6227] is textbox 'Search GitLab' required: False", "click [6833] where [6833] is link 'Issues 99 Result count is over limit.'", 'scroll [down]', "click [7581] where [7581] is lin…
175	[Action Summary] ['None', "click [403] where [403] is link 'Issues'", "click [1958] where [1958] is button 'Created date' hasPopup: listbox", 'press [Enter]', "click [1958] where [1958] is button 'Created date' focused: True hasPopup: listbox", "click [3239] where [3239] is option 'Updated date' selected: False", "click [3712] where [3712] is link 'Sort direction'", "click [5187] where [5187] is …
175	[Action Summary] ['None', "click [403] where [403] is link 'Issues'", "click [1958] where [1958] is button 'Created date' hasPopup: listbox", 'press [Enter]', "click [1958] where [1958] is button 'Created date' focused: True hasPopup: listbox", "click [3239] where [3239] is option 'Updated date' selected: False", "click [3712] where [3712] is link 'Sort direction'", "click [5187] where [5187] is …
176	[Action Summary] ['None', "click [403] where [403] is link 'Issues'", "click [1872] where [1872] is link 'Sort direction'", 'press [Enter]', "click [3433] where [3433] is button 'Created date' hasPopup: listbox", "click [4544] where [4544] is option 'Updated date' selected: False", 'scroll [down]', "click [5051] where [5051] is button 'Updated date' hasPopup: listbox", "click [5051] where [5051] …
178	[Action Summary] ['None', "click [403] where [403] is link 'Issues'", "click [1872] where [1872] is link 'Sort direction'", 'press [Enter]', "click [3347] where [3347] is link 'Sort direction'", "click [4913] where [4913] is link 'Better sharing solution'", "click [6232] where [6232] is generic 'This user has the owner role in the empathy-prompts project.'", 'stop [yes, the task is closed]']
180	[Action Summary] ['None', "click [403] where [403] is link 'Issues'", "click [2049] where [2049] is link 'Outdated dependencies'", 'stop [Open]']
180	[Action Summary] ['None', "click [403] where [403] is link 'Issues'", "click [2049] where [2049] is link 'Outdated dependencies'", 'stop [Open]']
181	[Action Summary] ['None', "click [403] where [403] is link 'Issues'", "click [1958] where [1958] is button 'Created date' hasPopup: listbox", 'press [Enter]', "click [1872] where [1872] is link 'Sort direction'", "click [3557] where [3557] is link 'Open 13'", 'scroll [down]', "click [5033] where [5033] is link 'Closed 53'", "click [5034] where [5034] is link 'All 66'", "type [6102] [theme editor …
183	[Action Summary] ['None', "click [96] where [96] is link '\\ue608 CATALOG'", "click [317] where [317] is link 'Products'", "click [2329] where [2329] is button '\\ue605Filters'", "click [3376] where [3376] is textbox 'from' required: False", "type [3376] [10 ] where [3376] is textbox 'from' focused: True required: False", "click [3345] where [3345] is button 'Apply Filters'", "stop [n/a, there's …
188	[Action Summary] ['None', "click [1256] where [1256] is link 'My Account'", 'stop [$365.42]']
189	[Action Summary] ['None', "click [1256] where [1256] is link 'My Account'", 'stop [$2,941.51]']
189	[Action Summary] ['None', "click [1256] where [1256] is link 'My Account'", 'stop [$2,941.51]']
190	[Action Summary] ['None', "click [1256] where [1256] is link 'My Account'", "click [4211] where [4211] is link 'My Orders'", 'stop [$65.32]']
191	[Action Summary] ['None', "click [1256] where [1256] is link 'My Account'", "click [4211] where [4211] is link 'My Orders'", 'press [PageDown]', 'press [PageDown]', 'press [Enter]', "click [7266] where [7266] is link '\\ue608 Page Next'", "click [8733] where [8733] is link 'View Order'", 'go_back', 'scroll [down]', "click [14144] where [14144] is link '\\ue608 Page Next'", "click [15628] where [1…
192	[Action Summary] ['None', "click [1256] where [1256] is link 'My Account'", 'stop [$2,941.51]']
197	[Action Summary] ['None', "click [90] where [90] is link '\\ue60b SALES'", "click [283] where [283] is link 'Orders'", "click [5520] where [5520] is button 'Clear all'", "click [5039] where [5039] is button '\\ue605Filters'", 'stop [$778.20]']
201	[Action Summary] ['None', "click [90] where [90] is link '\\ue60b SALES'", "click [283] where [283] is link 'Orders'", "click [5667] where [5667] is heading 'Orders'", "click [6347] where [6347] is button '\\ue605Filters'", "click [1263] where [1263] is button 'Search'", "click [12916] where [12916] is combobox 'notice-NXBFKX3' hasPopup: menu expanded: False", 'press [ArrowDown]', 'press [ArrowDo…
201	[Action Summary] ['None', "click [90] where [90] is link '\\ue60b SALES'", "click [283] where [283] is link 'Orders'", "click [5667] where [5667] is heading 'Orders'", "click [6347] where [6347] is button '\\ue605Filters'", "click [1263] where [1263] is button 'Search'", "click [12916] where [12916] is combobox 'notice-NXBFKX3' hasPopup: menu expanded: False", 'press [ArrowDown]', 'press [ArrowDo…
205	[Action Summary] ['None', "click [493] where [493] is link 'Repository'", "click [3981] where [3981] is link 'Commits'", 'stop [1]']
206	[Action Summary] ['None', "click [493] where [493] is link 'Repository'", "click [3981] where [3981] is link 'Commits'", 'press [Enter]', 'stop [2]']
206	[Action Summary] ['None', "click [493] where [493] is link 'Repository'", "click [3981] where [3981] is link 'Commits'", 'press [Enter]', 'stop [2]']
207	[Action Summary] ['None', "click [493] where [493] is link 'Repository'", "click [3981] where [3981] is link 'Commits'", 'press [Enter]', 'stop [1]']
208	[Action Summary] ['None', "click [102] where [102] is link '\\ue603 CUSTOMERS'", "click [332] where [332] is link 'All Customers'", "click [2794] where [2794] is button 'Clear all'", 'stop [John Smith, john.smith.xyz@gmail.com]']
209	[Action Summary] ['None', "click [102] where [102] is link '\\ue603 CUSTOMERS'", "click [332] where [332] is link 'All Customers'", "click [2724] where [2724] is button '\\ue605Filters'", "click [1263] where [1263] is button 'Search'", 'stop [Jennifer White; jennifer.white@yahoo.com]']
209	[Action Summary] ['None', "click [102] where [102] is link '\\ue603 CUSTOMERS'", "click [332] where [332] is link 'All Customers'", "click [2724] where [2724] is button '\\ue605Filters'", "click [1263] where [1263] is button 'Search'", 'stop [Jennifer White; jennifer.white@yahoo.com]']
210	[Action Summary] ['None', "click [102] where [102] is link '\\ue603 CUSTOMERS'", "click [332] where [332] is link 'All Customers'", 'stop [Adam Garcia, gamingpro456@gmail.com]']
211	[Action Summary] ['None', "click [102] where [102] is link '\\ue603 CUSTOMERS'", "click [332] where [332] is link 'All Customers'", "click [1262] where [1262] is textbox 'Search by keyword' required: False", "type [1262] [8015551212 ] where [1262] is textbox 'Search by keyword' focused: True required: False", 'stop [Sean Miller sean.miller@gmail.com]']
212	[Action Summary] ['None', "click [102] where [102] is link '\\ue603 CUSTOMERS'", "click [332] where [332] is link 'All Customers'", "click [2798] where [2798] is button 'Clear all'", 'stop [Veronica Costello, roni_cost@example.com]']
218	[Action Summary] ['None', "click [482] where [482] is link 'Find directions between two points'", "type [522] [carnegie mellon hotel ] where [522] is textbox 'From' required: False", "type [514] [Carnegie Mellon University ] where [514] is textbox 'To' required: False", "click [505] where [505] is button 'Go'", "click [503] where [503] is combobox '' hasPopup: menu expanded: False", 'press [PageD…
221	[Action Summary] ['None', "click [495] where [495] is button 'Go'", "type [12] [USPS Pittsburgh ] where [12] is textbox 'Search' required: False", "click [587] where [587] is link 'USPS, Forbes Avenue, Squirrel Hill North, Pittsburgh, Allegheny County, 15213, United States'", "click [482] where [482] is link 'Find directions between two points'", "type [773] [Carnegie Mellon University ] where [7…
224	[Action Summary] ['None', "click [35] where [35] is textbox 'Search' focused: True required: False", "type [35] [Wendy's Pittsburgh ] where [35] is textbox 'Search' focused: True required: False", 'click [589] where [589] is link "Wendy\'s, 5422, Baum Boulevard, Bloomfield, Pittsburgh, Allegheny County, 15232, United States"', "click [482] where [482] is link 'Find directions between two points'"…
225	[Action Summary] ['None', "click [1585] where [1585] is combobox '\\ue615 Search' autocomplete: both hasPopup: listbox required: False expanded: False", "type [1585] [brush from Sephora ] where [1585] is combobox '\\ue615 Search' focused: True autocomplete: both hasPopup: listbox required: False expanded: True", "click [4084] where [4084] is button 'Search' disabled: True", 'scroll [down]', "clic…
226	[Action Summary] ['None', "click [2430] where [2430] is link 'Advanced Search'", "type [3936] [Amazon Basics ] where [3936] is textbox 'Product Name' required: False", 'stop [$5.49 to $375.19]']
227	[Action Summary] ['None', 'scroll [down3]', "click [1457] where [1457] is link 'Advanced Search'", "type [3936] [EYZUTAK ] where [3936] is textbox 'Product Name' required: False", 'stop [$9.99]']
228	[Action Summary] ['None', "click [761] where [761] is menuitem '\\ue622 Beauty & Personal Care' hasPopup: menu", "type [4070] [sephora ] where [4070] is combobox '\\ue615 Search' autocomplete: both hasPopup: listbox required: False expanded: False", "click [6893] where [6893] is button 'Search' disabled: True", 'scroll [down2]', "click [6866] where [6866] is combobox 'Show' hasPopup: menu expande…
230	[Action Summary] ['None', 'scroll [down3]', "click [1457] where [1457] is link 'Advanced Search'", "type [3936] [Perricone MD ] where [3936] is textbox 'Product Name' required: False", 'stop [$35.00 to $149.00]']
231	[Action Summary] ['None', "click [1256] where [1256] is link 'My Account'", 'stop [the order number of the most recent cancelled order is 000000170.]']
231	[Action Summary] ['None', "click [1256] where [1256] is link 'My Account'", 'stop [the order number of the most recent cancelled order is 000000170.]']
232	[Action Summary] ['None', "click [1256] where [1256] is link 'My Account'", 'stop [000000191]']
233	[Action Summary] ['None', "click [1256] where [1256] is link 'My Account'", "click [4211] where [4211] is link 'My Orders'", 'stop [000000180]']
234	[Action Summary] ['None', "click [1256] where [1256] is link 'My Account'", "click [4211] where [4211] is link 'My Orders'", 'stop ["n/a, there\'s no item matching the requirement"]']
244	[Action Summary] ['None', "click [108] where [108] is link '\\ue609 MARKETING'", "click [419] where [419] is link 'All Reviews'", "click [2195] where [2195] is button 'Reset Filter'", "type [4435] [olivia ] where [4435] is textbox '' required: False", "click [6093] where [6093] is link 'Edit'", 'stop [emma.lopez@gmail.com]']
244	[Action Summary] ['None', "click [108] where [108] is link '\\ue609 MARKETING'", "click [419] where [419] is link 'All Reviews'", "click [2195] where [2195] is button 'Reset Filter'", "type [4435] [olivia ] where [4435] is textbox '' required: False", "click [6093] where [6093] is link 'Edit'", 'stop [emma.lopez@gmail.com]']
248	[Action Summary] ['None', "click [35] where [35] is textbox 'Search' focused: True required: False", "type [35] [Carnegie Mellon Café ] where [35] is textbox 'Search' focused: True required: False", "click [575] where [575] is link 'Carnegie Mellon Café, 5125, Margaret Morrison Street, Squirrel Hill North, Pittsburgh, Allegheny County, 15213, United States'", 'stop [40.4424191, -79.9397388]']
250	[Action Summary] ['None', "click [12] where [12] is textbox 'Search' focused: True required: False", "type [12] [apple store Pittsburgh ] where [12] is textbox 'Search' focused: True required: False", "click [580] where [580] is link 'Apple Store, Walnut Street, Shadyside, Pittsburgh, Allegheny County, 15206, United States'", 'stop [40.4511693, -79.9334241]']
252	[Action Summary] ['None', "click [12] where [12] is textbox 'Search' focused: True required: False", "type [12] [Tokyo Japanese Food Store, Pittsburgh ] where [12] is textbox 'Search' focused: True required: False", "click [575] where [575] is link 'Tokyo Japanese Food Store, 5855, Ellsworth Avenue, Shadyside, Pittsburgh, Allegheny County, 15232, United States'", 'scroll [down]', 'stop [40.45760,…
253	[Action Summary] ['None', "click [35] where [35] is textbox 'Search' focused: True required: False", "type [35] [Carnegie Mellon Café ] where [35] is textbox 'Search' focused: True required: False", "click [575] where [575] is link 'Carnegie Mellon Café, 5125, Margaret Morrison Street, Squirrel Hill North, Pittsburgh, Allegheny County, 15213, United States'", 'stop [N/A]']
254	[Action Summary] ['None', "click [12] where [12] is textbox 'Search' focused: True required: False", "type [12] [Western Pennsylvania Hospital, Pittsburgh ] where [12] is textbox 'Search' focused: True required: False", "click [580] where [580] is link 'Western Pennsylvania Hospital, 4800, Friendship Avenue, Bloomfield, Pittsburgh, Allegheny County, 15224, United States'", 'stop [+1 412 578 5000]…
254	[Action Summary] ['None', "click [12] where [12] is textbox 'Search' focused: True required: False", "type [12] [Western Pennsylvania Hospital, Pittsburgh ] where [12] is textbox 'Search' focused: True required: False", "click [580] where [580] is link 'Western Pennsylvania Hospital, 4800, Friendship Avenue, Bloomfield, Pittsburgh, Allegheny County, 15224, United States'", 'stop [+1 412 578 5000]…
255	[Action Summary] ['None', "click [35] where [35] is textbox 'Search' focused: True required: False", "type [35] [PIT airport Pittsburgh ] where [35] is textbox 'Search' focused: True required: False", "click [572] where [572] is link 'Pittsburgh International Airport, Southern Beltway, Findlay Township, Allegheny County, 15231, United States'", 'stop [Allegheny County Airport Authority]']
256	[Action Summary] ['None', "click [12] where [12] is textbox 'Search' focused: True required: False", "type [12] [Carnegie Art Museum Pittsburgh ] where [12] is textbox 'Search' focused: True required: False", "click [572] where [572] is link 'More results'", "click [575] where [575] is link 'Carnegie Museum of Art, South Craig Street, North Oakland, Pittsburgh, Allegheny County, 15213, United Sta…
257	[Action Summary] ['None', "click [35] where [35] is textbox 'Search' focused: True required: False", "type [35] [Tokyo Japanese Food Store, Pittsburgh ] where [35] is textbox 'Search' focused: True required: False", "click [575] where [575] is link 'Tokyo Japanese Food Store, 5855, Ellsworth Avenue, Shadyside, Pittsburgh, Allegheny County, 15232, United States'", 'stop [We-Su 10:00-17:00; Mo-Tu o…
258	[Action Summary] ['None', "click [413] where [413] is link 'Explore'", 'stop []']
259	[Action Summary] ['None', "click [409] where [409] is link 'Byte Blaze'", "click [1516] where [1516] is link 'Preferences'", "click [1890] where [1890] is link 'Access Tokens'", 'scroll [down]', "click [3739] where [3739] is button 'Click to reveal'", "click [3740] where [3740] is button 'Copy feed token' live: polite atomic: False relevant: additions text", 'stop [TMN_bBn9Z48qVbUFZV45]']
260	[Action Summary] ['None', "click [987] where [987] is menuitem '\\ue622 Video Games' hasPopup: menu", 'stop []']
261	[Action Summary] ['None', "click [911] where [911] is menuitem '\\ue622 Electronics' hasPopup: menu", "click [3545] where [3545] is menuitem '\\ue622 Electronics' hasPopup: menu", "click [6378] where [6378] is menuitem '\\ue622 Electronics' hasPopup: menu", "click [9211] where [9211] is menuitem '\\ue622 Electronics' hasPopup: menu", "click [12105] where [12105] is menuitem '\\ue622 Cell Phones &…
261	[Action Summary] ['None', "click [911] where [911] is menuitem '\\ue622 Electronics' hasPopup: menu", "click [3545] where [3545] is menuitem '\\ue622 Electronics' hasPopup: menu", "click [6378] where [6378] is menuitem '\\ue622 Electronics' hasPopup: menu", "click [9211] where [9211] is menuitem '\\ue622 Electronics' hasPopup: menu", "click [12105] where [12105] is menuitem '\\ue622 Cell Phones &…
262	[Action Summary] ['None', "click [836] where [836] is menuitem '\\ue622 Clothing, Shoes & Jewelry' hasPopup: menu", "click [3470] where [3470] is menuitem '\\ue622 Clothing, Shoes & Jewelry' hasPopup: menu", "click [6273] where [6273] is menuitem '\\ue622 Clothing, Shoes & Jewelry' hasPopup: menu", "click [9076] where [9076] is menuitem '\\ue622 Clothing, Shoes & Jewelry' hasPopup: menu", "click …
263	[Action Summary] ['None', "click [836] where [836] is menuitem '\\ue622 Clothing, Shoes & Jewelry' hasPopup: menu", "click [3470] where [3470] is menuitem '\\ue622 Clothing, Shoes & Jewelry' hasPopup: menu", "click [6273] where [6273] is menuitem '\\ue622 Clothing, Shoes & Jewelry' hasPopup: menu", "click [9066] where [9066] is menuitem '\\ue622 Sports & Outdoors' hasPopup: menu", "click [11879] …
269	[Action Summary] ['None', "click [836] where [836] is menuitem '\\ue622 Clothing, Shoes & Jewelry' hasPopup: menu", "click [3479] where [3479] is menuitem '\\ue622 Clothing, Shoes & Jewelry' hasPopup: menu", "click [7827] where [7827] is link 'Women( 9769 item )'", "click [10644] where [10644] is link 'Shoes( 4019 item )'", 'stop [["Amazon Essentials Women\'s Finley Flat Sandal: $19.50", "Women S…
270	[Action Summary] ['None', "click [836] where [836] is menuitem '\\ue622 Clothing, Shoes & Jewelry' hasPopup: menu", "click [3470] where [3470] is menuitem '\\ue622 Clothing, Shoes & Jewelry' hasPopup: menu", "click [6263] where [6263] is menuitem '\\ue622 Sports & Outdoors' hasPopup: menu", "click [9076] where [9076] is menuitem '\\ue622 Clothing, Shoes & Jewelry' hasPopup: menu", "click [11845] …
270	[Action Summary] ['None', "click [836] where [836] is menuitem '\\ue622 Clothing, Shoes & Jewelry' hasPopup: menu", "click [3470] where [3470] is menuitem '\\ue622 Clothing, Shoes & Jewelry' hasPopup: menu", "click [6263] where [6263] is menuitem '\\ue622 Sports & Outdoors' hasPopup: menu", "click [9076] where [9076] is menuitem '\\ue622 Clothing, Shoes & Jewelry' hasPopup: menu", "click [11845] …
271	[Action Summary] ['None', "click [761] where [761] is menuitem '\\ue622 Beauty & Personal Care' hasPopup: menu", "click [3395] where [3395] is menuitem '\\ue622 Beauty & Personal Care' hasPopup: menu", 'go_back', "click [9234] where [9234] is menuitem '\\ue622 Electronics' hasPopup: menu", "click [11718] where [11718] is menuitem '\\ue622 Beauty & Personal Care' hasPopup: menu", "click [14551] wh…
273	[Action Summary] ['None', "click [850] where [850] is menuitem '\\ue622 Home & Kitchen' hasPopup: menu", "click [3484] where [3484] is menuitem '\\ue622 Home & Kitchen' hasPopup: menu", "click [7732] where [7732] is link 'Furniture( 10537 item )'", "click [10475] where [10475] is link 'Accent Furniture( 806 item )'", "click [13222] where [13222] is link '$0.00 - $999.99( 788 item )'", 'stop [4D C…
274	[Action Summary] ['None', "click [1585] where [1585] is combobox '\\ue615 Search' autocomplete: both hasPopup: listbox required: False expanded: False", "type [1585] [usb wifi ] where [1585] is combobox '\\ue615 Search' focused: True autocomplete: both hasPopup: listbox required: False expanded: True", 'stop [https://www.onestopmarket.com/catalogsearch/result/?q=usb+wifi]']
275	[Action Summary] ['None', "click [1585] where [1585] is combobox '\\ue615 Search' autocomplete: both hasPopup: listbox required: False expanded: False", "type [1585] [xbox ] where [1585] is combobox '\\ue615 Search' focused: True autocomplete: both hasPopup: listbox required: False expanded: True", 'stop [https://www.onestopmarket.com/catalogsearch/result/?q=xbox]']
275	[Action Summary] ['None', "click [1585] where [1585] is combobox '\\ue615 Search' autocomplete: both hasPopup: listbox required: False expanded: False", "type [1585] [xbox ] where [1585] is combobox '\\ue615 Search' focused: True autocomplete: both hasPopup: listbox required: False expanded: True", 'stop [https://www.onestopmarket.com/catalogsearch/result/?q=xbox]']
276	[Action Summary] ['None', "click [1585] where [1585] is combobox '\\ue615 Search' autocomplete: both hasPopup: listbox required: False expanded: False", "type [1585] [switch accessories ] where [1585] is combobox '\\ue615 Search' focused: True autocomplete: both hasPopup: listbox required: False expanded: True", "click [4082] where [4082] is button 'Search' disabled: True", 'stop []']
277	[Action Summary] ['None', "click [1585] where [1585] is combobox '\\ue615 Search' autocomplete: both hasPopup: listbox required: False expanded: False", "type [1585] [batteries for iphone 13 ] where [1585] is combobox '\\ue615 Search' focused: True autocomplete: both hasPopup: listbox required: False expanded: True", 'stop [https://www.onestopmarket.com/catalogsearch/result/?q=batteries+for+iphon…
278	[Action Summary] ['None', "click [1585] where [1585] is combobox '\\ue615 Search' autocomplete: both hasPopup: listbox required: False expanded: False", "type [1585] [green tea bag for weight loss ] where [1585] is combobox '\\ue615 Search' focused: True autocomplete: both hasPopup: listbox required: False expanded: True", 'stop [https://www.onestopmarket.com/catalogsearch/result/?q=green+tea+bag…
293	[Action Summary] ['None', "click [1507] where [1507] is textbox 'Search GitLab' required: False", "type [1516] [Super_Awesome_Robot ] where [1516] is searchbox 'Search GitLab' focused: True describedby: search-input-description", "click [2082] where [2082] is link 'Convex Eggtart / Super_Awesome_Robot'", "click [2699] where [2699] is link 'Clone'", 'scroll [down]', 'stop [git clone ssh://git@104.…
294	[Action Summary] ['None', "click [1507] where [1507] is textbox 'Search GitLab' required: False", "type [1516] [ChatGPT ] where [1516] is searchbox 'Search GitLab' focused: True describedby: search-input-description", "click [2084] where [2084] is link 'Convex Eggtart / Chatgpt'", "click [2701] where [2701] is link 'Clone'", 'stop [ssh://git@209.20.157.253:2222/convexegg/chatgpt.git]']
294	[Action Summary] ['None', "click [1507] where [1507] is textbox 'Search GitLab' required: False", "type [1516] [ChatGPT ] where [1516] is searchbox 'Search GitLab' focused: True describedby: search-input-description", "click [2084] where [2084] is link 'Convex Eggtart / Chatgpt'", "click [2701] where [2701] is link 'Clone'", 'stop [ssh://git@209.20.157.253:2222/convexegg/chatgpt.git]']
295	[Action Summary] ['None', "click [1507] where [1507] is textbox 'Search GitLab' required: False", "type [1516] [metaseq ] where [1516] is searchbox 'Search GitLab' focused: True describedby: search-input-description", "click [2085] where [2085] is link 'Administrator / metaseq'", "click [2753] where [2753] is link 'Clone'", 'stop [git clone ssh://git@209.20.157.253:2222/root/metaseq.git]']
296	[Action Summary] ['None', "click [1507] where [1507] is textbox 'Search GitLab' required: False", "type [1516] [GAN ] where [1516] is searchbox 'Search GitLab' focused: True describedby: search-input-description", "click [1801] where [1801] is button 'Any' hasPopup: menu expanded: False", "click [2270] where [2270] is menuitem 'Any'", "click [3025] where [3025] is link 'Erik Linder-Norén / PyTorc…
298	[Action Summary] ['None', "click [1256] where [1256] is link 'My Account'", "click [4166] where [4166] is link 'My Orders'", "click [6406] where [6406] is link 'View Order'", 'stop [Order # 000000180 - Complete, ordered on March 11, 2023. Items include: IDweel iPhone SE 2020 Case ($12.99), Vidpro MP-10 Monopod ($6.28), Boho Rainbow Cake Topper ($7.99), Designer Skin for Sony PlayStation PS3 SLIM …
300	[Action Summary] ['None', "click [1256] where [1256] is link 'My Account'", "click [4165] where [4165] is link 'My Orders'", 'stop [Order #: 000000189, Date: 5/2/23, Order Total: $754.99, Status: Pending]']
300	[Action Summary] ['None', "click [1256] where [1256] is link 'My Account'", "click [4165] where [4165] is link 'My Orders'", 'stop [Order #: 000000189, Date: 5/2/23, Order Total: $754.99, Status: Pending]']
305	[Action Summary] ['None', "click [493] where [493] is link 'Repository'", "click [3981] where [3981] is link 'Commits'", 'press [Enter]', "click [5501] where [5501] is button 'Author' hasPopup: menu expanded: False", 'press [Enter]', "click [8043] where [8043] is menuitem 'avatar Byte Blaze byteblaze'", 'press [Enter]', "click [8404] where [8404] is button 'main' hasPopup: menu expanded: False", …
308	[Action Summary] ['None', "click [1507] where [1507] is textbox 'Search GitLab' required: False", "type [1516] [design ] where [1516] is searchbox 'Search GitLab' focused: True describedby: search-input-description", "click [2238] where [2238] is link 'Primer / design'", "click [3073] where [3073] is link 'Repository'", "click [5996] where [5996] is link 'Contributors'", 'press [Enter]', 'stop [S…
308	[Action Summary] ['None', "click [1507] where [1507] is textbox 'Search GitLab' required: False", "type [1516] [design ] where [1516] is searchbox 'Search GitLab' focused: True describedby: search-input-description", "click [2238] where [2238] is link 'Primer / design'", "click [3073] where [3073] is link 'Repository'", "click [5996] where [5996] is link 'Contributors'", 'press [Enter]', 'stop [S…
309	[Action Summary] ['None', "click [1507] where [1507] is textbox 'Search GitLab' required: False", "type [1516] [administrate ] where [1516] is searchbox 'Search GitLab' focused: True describedby: search-input-description", "click [2085] where [2085] is link 'thoughtbot, inc. / administrate'", "click [2618] where [2618] is link 'Repository'", "click [5961] where [5961] is link 'Contributors'", 'st…
310	[Action Summary] ['None', "click [1507] where [1507] is textbox 'Search GitLab' required: False", "type [1516] [AndroidSlidingUpPanel ] where [1516] is searchbox 'Search GitLab' focused: True describedby: search-input-description", "click [2085] where [2085] is link 'Umano: News Read To You / AndroidSlidingUpPanel'", "click [2692] where [2692] is link 'Repository'", "click [6515] where [6515] is …
311	[Action Summary] ['None', "click [1507] where [1507] is textbox 'Search GitLab' required: False", "type [1516] [Pytorch GAN ] where [1516] is searchbox 'Search GitLab' focused: True describedby: search-input-description", "click [2075] where [2075] is link 'Projects 1'", "click [2690] where [2690] is link 'Erik Linder-Norén / PyTorch-GAN'", "click [3237] where [3237] is link 'Repository'", "click…
311	[Action Summary] ['None', "click [1507] where [1507] is textbox 'Search GitLab' required: False", "type [1516] [Pytorch GAN ] where [1516] is searchbox 'Search GitLab' focused: True describedby: search-input-description", "click [2075] where [2075] is link 'Projects 1'", "click [2690] where [2690] is link 'Erik Linder-Norén / PyTorch-GAN'", "click [3237] where [3237] is link 'Repository'", "click…
312	[Action Summary] ['None', "click [1507] where [1507] is textbox 'Search GitLab' required: False", "type [1516] [csvkit ] where [1516] is searchbox 'Search GitLab' focused: True describedby: search-input-description", "click [1794] where [1794] is button 'Any' hasPopup: menu expanded: False", "click [2085] where [2085] is link 'wireservice / csvkit'", "click [2828] where [2828] is link 'Repository…
313	[Action Summary] ['None', 'scroll [down3]', "click [1465] where [1465] is link 'Contact Us'", "stop [n/a, there's no information given]"]
314	[Action Summary] ['None', "click [1507] where [1507] is textbox 'Search GitLab' required: False", "type [1516] [design ] where [1516] is searchbox 'Search GitLab' focused: True describedby: search-input-description", "click [2238] where [2238] is link 'Primer / design'", "click [3073] where [3073] is link 'Repository'", "click [5996] where [5996] is link 'Contributors'", 'press [Enter]', 'stop [S…
315	[Action Summary] ['None', "click [1507] where [1507] is textbox 'Search GitLab' required: False", "type [1516] [Pytorch GAN ] where [1516] is searchbox 'Search GitLab' focused: True describedby: search-input-description", "click [2085] where [2085] is link 'Erik Linder-Norén / PyTorch-GAN'", "click [2632] where [2632] is link 'Repository'", "click [8207] where [8207] is link 'Contributors'", 'sto…
317	[Action Summary] ['None', "click [1507] where [1507] is textbox 'Search GitLab' required: False", "type [1516] [metaseq ] where [1516] is searchbox 'Search GitLab' focused: True describedby: search-input-description", "click [2085] where [2085] is link 'Administrator / metaseq'", "click [2473] where [2473] is listitem 'metaseq'", "click [4718] where [4718] is link 'Repository'", "click [7661] whe…
317	[Action Summary] ['None', "click [1507] where [1507] is textbox 'Search GitLab' required: False", "type [1516] [metaseq ] where [1516] is searchbox 'Search GitLab' focused: True describedby: search-input-description", "click [2085] where [2085] is link 'Administrator / metaseq'", "click [2473] where [2473] is listitem 'metaseq'", "click [4718] where [4718] is link 'Repository'", "click [7661] whe…
318	[Action Summary] ['None', "click [1507] where [1507] is textbox 'Search GitLab' required: False", "type [1516] [2019-nCov ] where [1516] is searchbox 'Search GitLab' focused: True describedby: search-input-description", "click [2085] where [2085] is link 'yjlou / 2019-nCov'", "click [2561] where [2561] is link 'Repository'", "click [5271] where [5271] is link 'Commits'", 'scroll [down]', "click […
324	[Action Summary] ['None', "click [850] where [850] is menuitem '\\ue622 Home & Kitchen' hasPopup: menu", 'scroll [down]', "click [3726] where [3726] is main ''", "click [6315] where [6315] is menuitem '\\ue622 Office Products' hasPopup: menu", "click [8592] where [8592] is menuitem '\\ue622 Office Products' hasPopup: menu", "click [11254] where [11254] is menuitem '\\ue622 Office Products' hasPop…
324	[Action Summary] ['None', "click [850] where [850] is menuitem '\\ue622 Home & Kitchen' hasPopup: menu", 'scroll [down]', "click [3726] where [3726] is main ''", "click [6315] where [6315] is menuitem '\\ue622 Office Products' hasPopup: menu", "click [8592] where [8592] is menuitem '\\ue622 Office Products' hasPopup: menu", "click [11254] where [11254] is menuitem '\\ue622 Office Products' hasPop…
325	[Action Summary] ['None', "click [1596] where [1596] is combobox '\\ue615 Search' autocomplete: both hasPopup: listbox required: False expanded: False", "type [1596] [mouth night guard ] where [1596] is combobox '\\ue615 Search' focused: True autocomplete: both hasPopup: listbox required: False expanded: True", "click [4071] where [4071] is button 'Search' disabled: True", "click [3921] where [39…
326	[Action Summary] ['None', "click [1596] where [1596] is combobox '\\ue615 Search' autocomplete: both hasPopup: listbox required: False expanded: False", "type [1596] [Canon photo printer ] where [1596] is combobox '\\ue615 Search' focused: True autocomplete: both hasPopup: listbox required: False expanded: True", 'stop []']
327	[Action Summary] ['None', "click [1596] where [1596] is combobox '\\ue615 Search' autocomplete: both hasPopup: listbox required: False expanded: False", "type [1596] [iphone 12 phone case ] where [1596] is combobox '\\ue615 Search' focused: True autocomplete: both hasPopup: listbox required: False expanded: True", "click [4071] where [4071] is button 'Search' disabled: True", "click [3921] where …
328	[Action Summary] ['None', "click [1596] where [1596] is combobox '\\ue615 Search' autocomplete: both hasPopup: listbox required: False expanded: False", "type [1596] [iphone 12 phone case ] where [1596] is combobox '\\ue615 Search' focused: True autocomplete: both hasPopup: listbox required: False expanded: True", "click [4070] where [4070] is button 'Search' disabled: True", "click [3920] where …
330	[Action Summary] ['None', "click [1256] where [1256] is link 'My Account'", "click [4165] where [4165] is link 'My Orders'", 'stop [$83.31]']
330	[Action Summary] ['None', "click [1256] where [1256] is link 'My Account'", "click [4165] where [4165] is link 'My Orders'", 'stop [$83.31]']
339	[Action Summary] ['None', "click [495] where [495] is link 'Issues'", "click [2857] where [2857] is tab 'Open 40' selected: True controls: __BVID__9", "type [3131] [label ] where [3131] is textbox 'Search or filter results...' required: False", "click [5063] where [5063] is menuitem '= is'", 'press [Enter]', "type [5390] [label ] where [5390] is textbox 'Search or filter results...' required: Fal…
342	[Action Summary] ['None', "click [2019] where [2019] is textbox 'Search GitLab' required: False", "type [2125] [metaseq ] where [2125] is searchbox 'Search GitLab' focused: True describedby: search-input-description", "click [10785] where [10785] is link 'Issues 99'", "click [20710] where [20710] is radio 'Open' checked: false", 'press [Enter]', 'stop []']
344	[Action Summary] ['None', "click [108] where [108] is link '\\ue609 MARKETING'", "click [419] where [419] is link 'All Reviews'", "click [2135] where [2135] is button 'System Messages: 1'", 'stop [350]']
346	[Action Summary] ['None', "click [108] where [108] is link '\\ue609 MARKETING'", "click [419] where [419] is link 'All Reviews'", "click [2195] where [2195] is button 'Reset Filter'", "type [3113] [1/1/22 ] where [3113] is textbox 'From' required: False", "type [4970] [12/31/22 ] where [4970] is textbox 'To' required: False", "click [7764] where [7764] is button 'Search'", 'stop [zero]']
347	[Action Summary] ['None', "click [108] where [108] is link '\\ue609 MARKETING'", "click [419] where [419] is link 'All Reviews'", 'scroll [down]', "click [1257] where [1257] is textbox 'From' required: False", "type [2571] [1/1/16 ] where [2571] is textbox '' required: False", "type [1259] [12/31/24 ] where [1259] is textbox 'To' required: False", 'stop [the total number of reviews from the begin…
348	[Action Summary] ['None', "click [108] where [108] is link '\\ue609 MARKETING'", "click [419] where [419] is link 'All Reviews'", "click [2195] where [2195] is button 'Reset Filter'", "click [4413] where [4413] is button 'undefined \\ue627'", 'scroll [down]', "click [5246] where [5246] is link '19'", "click [4418] where [4418] is button 'undefined \\ue627'", "click [3212] where [3212] is link 'Ma…
349	[Action Summary] ['None', "click [1507] where [1507] is textbox 'Search GitLab' required: False", "type [1516] [gimmiethat.space ] where [1516] is searchbox 'Search GitLab' focused: True describedby: search-input-description", "click [2086] where [2086] is link 'Byte Blaze / gimmiethat.space'", "click [2661] where [2661] is link 'Settings'", "click [4255] where [4255] is link 'Create new...'", "c…
350	[Action Summary] ['None', "click [1507] where [1507] is textbox 'Search GitLab' required: False", 'scroll [down]', "type [1516] [prism-theme ] where [1516] is searchbox 'Search GitLab' focused: True describedby: search-input-description", "click [2099] where [2099] is link 'Byte Blaze / solarized-prism-theme'", 'press [Enter]', "click [2735] where [2735] is link 'Settings'", "click [4318] where […
351	[Action Summary] ['None', "click [987] where [987] is menuitem '\\ue622 Video Games' hasPopup: menu", "click [3630] where [3630] is menuitem '\\ue622 Video Games' hasPopup: menu", "click [6404] where [6404] is menuitem '\\ue622 Video Games' hasPopup: menu", "click [9178] where [9178] is menuitem '\\ue622 Video Games' hasPopup: menu", "click [13346] where [13346] is link 'PlayStation 4( 233 item )…
354	[Action Summary] ['None', "click [850] where [850] is menuitem '\\ue622 Home & Kitchen' hasPopup: menu", "click [3481] where [3481] is menuitem '\\ue622 Home & Kitchen' hasPopup: menu", "click [6249] where [6249] is menuitem '\\ue622 Home & Kitchen' hasPopup: menu", "click [9017] where [9017] is menuitem '\\ue622 Home & Kitchen' hasPopup: menu", "click [11785] where [11785] is menuitem '\\ue622 H…
355	[Action Summary] ['None', "click [850] where [850] is menuitem '\\ue622 Home & Kitchen' hasPopup: menu", "click [3481] where [3481] is menuitem '\\ue622 Home & Kitchen' hasPopup: menu", "click [7773] where [7773] is link 'Bedding( 1468 item )'", 'click [10545] where [10545] is link "Kids\' Bedding( 100 item )"', "click [12132] where [12132] is combobox 'Sort By' hasPopup: menu expanded: False", "…
355	[Action Summary] ['None', "click [850] where [850] is menuitem '\\ue622 Home & Kitchen' hasPopup: menu", "click [3481] where [3481] is menuitem '\\ue622 Home & Kitchen' hasPopup: menu", "click [7773] where [7773] is link 'Bedding( 1468 item )'", 'click [10545] where [10545] is link "Kids\' Bedding( 100 item )"', "click [12132] where [12132] is combobox 'Sort By' hasPopup: menu expanded: False", "…
356	[Action Summary] ['None', "click [482] where [482] is link 'Find directions between two points'", "type [522] [SCS CMU Pittsburgh ] where [522] is textbox 'From' required: False", "type [514] [Independence Hall Philadelphia ] where [514] is textbox 'To' required: False", "click [505] where [505] is button 'Go'", 'scroll [down]', "stop [n/a, there's no information given]"]
357	[Action Summary] ['None', "click [404] where [404] is link 'Merge requests'", "click [1526] where [1526] is link 'Review requests for you 5'", 'stop []']
361	[Action Summary] ['None', "click [1261] where [1261] is link 'My Account'", "click [4220] where [4220] is link 'My Orders'", 'stop [the status for order number 170 is Canceled and for order number 189 is Pending.]']
363	[Action Summary] ['None', "click [482] where [482] is link 'Find directions between two points'", "click [522] where [522] is textbox 'From' required: False", "type [522] [Carnegie Mellon University ] where [522] is textbox 'From' focused: True required: False", "click [514] where [514] is textbox 'To' required: False", "type [514] [Carnegie Music Hall ] where [514] is textbox 'To' focused: True …
364	[Action Summary] ['None', "click [482] where [482] is link 'Find directions between two points'", "click [522] where [522] is textbox 'From' required: False", "type [522] [Carnegie Mellon University ] where [522] is textbox 'From' focused: True required: False", "click [514] where [514] is textbox 'To' required: False", "type [514] [UPMC Shadyside ] where [514] is textbox 'To' focused: True requi…
364	[Action Summary] ['None', "click [482] where [482] is link 'Find directions between two points'", "click [522] where [522] is textbox 'From' required: False", "type [522] [Carnegie Mellon University ] where [522] is textbox 'From' focused: True required: False", "click [514] where [514] is textbox 'To' required: False", "type [514] [UPMC Shadyside ] where [514] is textbox 'To' focused: True requi…
365	[Action Summary] ['None', "click [35] where [35] is textbox 'Search' focused: True required: False", "type [35] [Carnegie Music Hall ] where [35] is textbox 'Search' focused: True required: False", "click [576] where [576] is link 'Carnegie Music Hall, Forbes Avenue, North Oakland, Pittsburgh, Allegheny County, 15213, United States'", "click [482] where [482] is link 'Find directions between two …
368	[Action Summary] ['None', "click [1261] where [1261] is link 'My Account'", "click [3818] where [3818] is link 'store logo'", "click [5759] where [5759] is menuitem '\\ue622 Beauty & Personal Care' hasPopup: menu", 'scroll [down3]', "click [9049] where [9049] is combobox 'Show' hasPopup: menu expanded: False", "click [9814] where [9814] is link '\\ue608 Page Next'", "click [11311] where [11311] i…
369	[Action Summary] ['None', "click [12] where [12] is textbox 'Search' focused: True required: False", "type [12] [Carnegie Music Hall ] where [12] is textbox 'Search' focused: True required: False", "click [576] where [576] is link 'Carnegie Music Hall, Forbes Avenue, North Oakland, Pittsburgh, Allegheny County, 15213, United States'", 'stop [https://www.openstreetmap.org/way/154257484]']
370	[Action Summary] ['None', "click [12] where [12] is textbox 'Search' focused: True required: False", "type [12] [Carnegie Mellon University ] where [12] is textbox 'Search' focused: True required: False", "click [577] where [577] is link 'Carnegie Mellon University, Schenley Drive Extension, North Oakland, Pittsburgh, Allegheny County, 15213, United States'", 'stop [https://www.openstreetmap.orgr…
370	[Action Summary] ['None', "click [12] where [12] is textbox 'Search' focused: True required: False", "type [12] [Carnegie Mellon University ] where [12] is textbox 'Search' focused: True required: False", "click [577] where [577] is link 'Carnegie Mellon University, Schenley Drive Extension, North Oakland, Pittsburgh, Allegheny County, 15213, United States'", 'stop [https://www.openstreetmap.orgr…
371	[Action Summary] ['None', "click [12] where [12] is textbox 'Search' focused: True required: False", "type [12] [Piada restaurant Pittsburgh ] where [12] is textbox 'Search' focused: True required: False", "click [580] where [580] is link 'Piada Italian Street Food, 3600, Forbes Avenue, Oakland, Central Oakland, Pittsburgh, Allegheny County, 15213, United States'", 'stop [3600 Forbes Avenue, Pitt…
372	[Action Summary] ['None', "click [12] where [12] is textbox 'Search' focused: True required: False", "type [12] [costco pittsburgh ] where [12] is textbox 'Search' focused: True required: False", "click [576] where [576] is link 'Costco, 501, Waterfront Drive West, The Waterfront, Pittsburgh, Allegheny County, 15207, United States'", 'stop [`https://www.openstreetmap.orgway/168456128`]']
373	[Action Summary] ['None', "click [35] where [35] is textbox 'Search' focused: True required: False", "type [35] [Whole Foods Pittsburgh ] where [35] is textbox 'Search' focused: True required: False", "click [495] where [495] is button 'Go'", "click [619] where [619] is link 'Whole Foods Market, 5700, Penn Avenue, East Liberty, Pittsburgh, Allegheny County, 15206, United States'", 'stop [Address:…
374	[Action Summary] ['None', "click [114] where [114] is link '\\ue602 CONTENT'", "click [474] where [474] is link 'Themes'", "click [2110] where [2110] is gridcell 'Magento Blank' required: False", "click [3145] where [3145] is link ''", "click [3145] where [3145] is link '' focused: True", "click [3145] where [3145] is link '' focused: True", "click [2409] where [2409] is link 'Magento Admin Panel…
375	[Action Summary] ['None', "click [114] where [114] is link '\\ue602 CONTENT'", 'scroll [down]', 'scroll [down]', 'scroll [down]', 'scroll [down]', "click [474] where [474] is link 'Themes'", "click [2178] where [2178] is link 'View'", 'scroll [down]', 'scroll [down]', 'scroll [down]', 'scroll [down]', 'scroll [down]', 'scroll [down]', 'scroll [down]', 'scroll [down]', 'scroll [down]', 'scroll [do…
375	[Action Summary] ['None', "click [114] where [114] is link '\\ue602 CONTENT'", 'scroll [down]', 'scroll [down]', 'scroll [down]', 'scroll [down]', "click [474] where [474] is link 'Themes'", "click [2178] where [2178] is link 'View'", 'scroll [down]', 'scroll [down]', 'scroll [down]', 'scroll [down]', 'scroll [down]', 'scroll [down]', 'scroll [down]', 'scroll [down]', 'scroll [down]', 'scroll [do…
376	[Action Summary] ['None', "type [1594] [Amazon Echo Dot 3rd generation ] where [1594] is combobox '\\ue615 Search' autocomplete: both hasPopup: listbox required: False expanded: False", "click [4087] where [4087] is button 'Search' disabled: True", 'scroll [down]', "click [4891] where [4891] is img 'Image'", "stop [n/a, there's no information given.]"]
377	[Action Summary] ['None', "click [12] where [12] is textbox 'Search' focused: True required: False", "type [12] [restaurants, CMU ArtPark Lab ] where [12] is textbox 'Search' focused: True required: False", "stop [n/a, there's no information given]"]
378	[Action Summary] ['None', "click [12] where [12] is textbox 'Search' focused: True required: False", "type [12] [parking, Carnegie Mellon University ] where [12] is textbox 'Search' focused: True required: False", "stop [n/a, there's no information given]"]
378	[Action Summary] ['None', "click [12] where [12] is textbox 'Search' focused: True required: False", "type [12] [parking, Carnegie Mellon University ] where [12] is textbox 'Search' focused: True required: False", "stop [n/a, there's no information given]"]
379	[Action Summary] ['None', "click [35] where [35] is textbox 'Search' focused: True required: False", "type [35] [hotel Carnegie Mellon University ] where [35] is textbox 'Search' focused: True required: False", "click [495] where [495] is button 'Go'", "stop [n/a, there's no information given]"]
381	[Action Summary] ['None', "click [35] where [35] is textbox 'Search' focused: True required: False", "type [35] [hotel, Carnegie Music Hall ] where [35] is textbox 'Search' focused: True required: False", "stop [n/a, there's no information given]"]
384	[Action Summary] ['None', "click [1594] where [1594] is combobox '\\ue615 Search' autocomplete: both hasPopup: listbox required: False expanded: False", "type [1594] [EYZUTAK phone cases ] where [1594] is combobox '\\ue615 Search' focused: True autocomplete: both hasPopup: listbox required: False expanded: True", "click [4093] where [4093] is button 'Search' disabled: True", 'scroll [down]', "cli…
386	[Action Summary] ['None', "click [1596] where [1596] is combobox '\\ue615 Search' autocomplete: both hasPopup: listbox required: False expanded: False", "type [1596] [Ugreen lightning to 3.5mm cable ] where [1596] is combobox '\\ue615 Search' focused: True autocomplete: both hasPopup: listbox required: False expanded: True", 'stop [65]']
387	[Action Summary] ['None', "click [972] where [972] is menuitem '\\ue622 Cell Phones & Accessories' hasPopup: menu", "click [5005] where [5005] is link 'Cases, Holsters & Sleeves( 457 item )'", "type [4057] [EYZUTAK ] where [4057] is combobox '\\ue615 Search' autocomplete: both hasPopup: listbox required: False expanded: False", "click [6755] where [6755] is button 'Search' disabled: True", 'scrol…
389	[Action Summary] ['None', "click [1708] where [1708] is textbox 'Search GitLab' required: False", "type [1717] [design ] where [1717] is searchbox 'Search GitLab' focused: True describedby: search-input-description", "click [2439] where [2439] is link 'Primer / design'", "click [3278] where [3278] is link 'Merge requests'", "click [5753] where [5753] is link 'Octovisuals Page'", 'scroll [down2]',…
390	[Action Summary] ['None', "click [1507] where [1507] is textbox 'Search GitLab' required: False", "type [1516] [a11yproject.com ] where [1516] is searchbox 'Search GitLab' focused: True describedby: search-input-description", "click [2086] where [2086] is link 'The A11Y Project / a11yproject.com'", "click [2689] where [2689] is link 'Merge requests'", "click [5118] where [5118] is link 'All 913'"…
390	[Action Summary] ['None', "click [1507] where [1507] is textbox 'Search GitLab' required: False", "type [1516] [a11yproject.com ] where [1516] is searchbox 'Search GitLab' focused: True describedby: search-input-description", "click [2086] where [2086] is link 'The A11Y Project / a11yproject.com'", "click [2689] where [2689] is link 'Merge requests'", "click [5118] where [5118] is link 'All 913'"…
391	[Action Summary] ['None', "click [1507] where [1507] is textbox 'Search GitLab' required: False", "type [1516] [a11yproject.com ] where [1516] is searchbox 'Search GitLab' focused: True describedby: search-input-description", "click [2086] where [2086] is link 'The A11Y Project / a11yproject.com'", "click [2689] where [2689] is link 'Merge requests'", "click [5118] where [5118] is link 'All 913'"…
392	[Action Summary] ['None', "click [542] where [542] is link 'The A11Y Project / a11yproject.com'", "click [2010] where [2010] is link 'Merge requests'", "click [6157] where [6157] is textbox 'Search or filter results...' required: False", 'press [Enter]', "type [8598] [color utility ] where [8598] is textbox 'Search or filter results...' required: False", "click [9446] where [9446] is link 'Add co…
393	[Action Summary] ['None', "click [1507] where [1507] is textbox 'Search GitLab' required: False", "type [1516] [empathy-prompts ] where [1516] is searchbox 'Search GitLab' focused: True describedby: search-input-description", "click [2135] where [2135] is link 'Byte Blaze / empathy-prompts'", "click [2865] where [2865] is link 'Merge requests'", "click [5601] where [5601] is link 'Fix broken link…
394	[Action Summary] ['None', "click [1507] where [1507] is textbox 'Search GitLab' required: False", "type [1516] [2019-nCov ] where [1516] is searchbox 'Search GitLab' focused: True describedby: search-input-description", "click [2085] where [2085] is link 'yjlou / 2019-nCov'", "click [2500] where [2500] is link 'Fork'", "click [4431] where [4431] is button 'Fork project'", 'stop []']
395	[Action Summary] ['None', "click [1507] where [1507] is textbox 'Search GitLab' required: False", "type [1516] [Pytorch ] where [1516] is searchbox 'Search GitLab' focused: True describedby: search-input-description", "click [2147] where [2147] is link 'Erik Linder-Norén / PyTorch-GAN'", "click [2720] where [2720] is link 'Fork'", 'stop []']
395	[Action Summary] ['None', "click [1507] where [1507] is textbox 'Search GitLab' required: False", "type [1516] [Pytorch ] where [1516] is searchbox 'Search GitLab' focused: True describedby: search-input-description", "click [2147] where [2147] is link 'Erik Linder-Norén / PyTorch-GAN'", "click [2720] where [2720] is link 'Fork'", 'stop []']
396	[Action Summary] ['None', "click [1507] where [1507] is textbox 'Search GitLab' required: False", "type [1516] [ChatGPT ] where [1516] is searchbox 'Search GitLab' focused: True describedby: search-input-description", "click [2075] where [2075] is link 'Projects 1'", "click [2686] where [2686] is link 'Convex Eggtart / Chatgpt'", "click [3093] where [3093] is link 'Fork'", 'stop []']
397	[Action Summary] ['None', "click [1507] where [1507] is textbox 'Search GitLab' required: False", "type [1516] [MetaSeq ] where [1516] is searchbox 'Search GitLab' focused: True describedby: search-input-description", "click [2085] where [2085] is link 'Administrator / metaseq'", "click [2528] where [2528] is link 'Fork'", "click [4639] where [4639] is button 'Fork project'", 'stop []']
399	[Action Summary] ['None', "click [12] where [12] is button 'MarvelsGrantMan136' hasPopup: menu expanded: False", "click [249] where [249] is link ' Profile'", "click [886] where [886] is link 'Edit biography'", "type [2456] [I am a robot ] where [2456] is textbox 'Biography' required: False describedby: user_biography_biography_help", "click [2474] where [2474] is button 'Save'", 'stop []']
400	[Action Summary] ['None', "click [12] where [12] is button 'MarvelsGrantMan136' hasPopup: menu expanded: False", "click [249] where [249] is link ' Profile'", "click [886] where [886] is link 'Edit biography'", "type [2456] [Pro Python Developer with 20 years of Experience ] where [2456] is textbox 'Biography' required: False describedby: user_biography_biography_help", "click [2474] where [2474]…
400	[Action Summary] ['None', "click [12] where [12] is button 'MarvelsGrantMan136' hasPopup: menu expanded: False", "click [249] where [249] is link ' Profile'", "click [886] where [886] is link 'Edit biography'", "type [2456] [Pro Python Developer with 20 years of Experience ] where [2456] is textbox 'Biography' required: False describedby: user_biography_biography_help", "click [2474] where [2474]…
401	[Action Summary] ['None', "click [12] where [12] is button 'MarvelsGrantMan136' hasPopup: menu expanded: False", "click [249] where [249] is link ' Profile'", "click [886] where [886] is link 'Edit biography'", "type [2456] [Seeking SDE positions ] where [2456] is textbox 'Biography' required: False describedby: user_biography_biography_help", "click [2474] where [2474] is button 'Save'", 'stop […
402	[Action Summary] ['None', "click [12] where [12] is button 'MarvelsGrantMan136' hasPopup: menu expanded: False", "click [249] where [249] is link ' Profile'", "click [886] where [886] is link 'Edit biography'", "type [2456] [Freelance Web Developer ] where [2456] is textbox 'Biography' required: False describedby: user_biography_biography_help", "click [2474] where [2474] is button 'Save'", 'stop…
403	[Action Summary] ['None', "click [12] where [12] is button 'MarvelsGrantMan136' hasPopup: menu expanded: False", "click [249] where [249] is link ' Profile'", "click [886] where [886] is link 'Edit biography'", "type [2456] [Awesome Prompt Artist ] where [2456] is textbox 'Biography' required: False describedby: user_biography_biography_help", "click [2474] where [2474] is button 'Save'", 'stop […
404	[Action Summary] ['None', "click [65] where [65] is link 'Forums'", 'scroll [down3]', "click [592] where [592] is link 'books — books'", "click [1217] where [1217] is button 'Sort by: Hot' hasPopup: menu expanded: False", "click [2990] where [2990] is link 'New'", "click [3696] where [3696] is link 'Adults reading to each other out loud?'", "click [4911] where [4911] is button 'Upvote'", 'stop []…
405	[Action Summary] ['None', "click [65] where [65] is link 'Forums'", 'scroll [down3]', "click [981] where [981] is link 'Next'", 'scroll [down3]', "click [1570] where [1570] is link 'DIY — DIY'", "click [2180] where [2180] is button 'Sort by: Hot' hasPopup: menu expanded: False", "click [3961] where [3961] is link 'New'", "click [4245] where [4245] is button 'Upvote'", 'stop []']
405	[Action Summary] ['None', "click [65] where [65] is link 'Forums'", 'scroll [down3]', "click [981] where [981] is link 'Next'", 'scroll [down3]', "click [1570] where [1570] is link 'DIY — DIY'", "click [2180] where [2180] is button 'Sort by: Hot' hasPopup: menu expanded: False", "click [3961] where [3961] is link 'New'", "click [4245] where [4245] is button 'Upvote'", 'stop []']
408	[Action Summary] ['None', "click [65] where [65] is link 'Forums'", 'scroll [down2]', "click [582] where [582] is link 'explainlikeimfive — explainlikeimfive'", "click [1217] where [1217] is button 'Sort by: Hot' hasPopup: menu expanded: False", "click [2960] where [2960] is link 'New'", "click [3648] where [3648] is link 'Eli5 why does pressing my palms against my eyes create a kaleidoscope effe…
410	[Action Summary] ['None', 'scroll [down]', "click [5556] where [5556] is link 'Reply'", "click [14707] where [14707] is textbox 'Comment' required: True describedby: reply_to_comment_1042264_comment_help", "type [14707] [don't panic ] where [14707] is textbox 'Comment' focused: True required: True describedby: reply_to_comment_1042264_comment_help", "click [14720] where [14720] is button 'Post'",…
410	[Action Summary] ['None', 'scroll [down]', "click [5556] where [5556] is link 'Reply'", "click [14707] where [14707] is textbox 'Comment' required: True describedby: reply_to_comment_1042264_comment_help", "type [14707] [don't panic ] where [14707] is textbox 'Comment' focused: True required: True describedby: reply_to_comment_1042264_comment_help", "click [14720] where [14720] is button 'Post'",…
416	[Action Summary] ['None', "click [404] where [404] is link 'Merge requests'", "click [1516] where [1516] is link 'Assigned to you 3'", 'press [Enter]', "click [1876] where [1876] is link 'Add verification functions'", 'press [PageDown]', 'press [PageDown]', "type [4503] [Thank you ] where [4503] is textbox 'Comment' required: False", "click [4546] where [4546] is button 'Comment'", 'press [Enter]…
418	[Action Summary] ['None', "click [1301] where [1301] is img 'Byte Blaze'", "click [1732] where [1732] is button 'Set status'", "click [1765] where [1765] is checkbox 'Set yourself as busy Displays that you are busy or not able to respond' checked: false", 'press [Enter]', "click [1798] where [1798] is button 'Set status'", "click [2319] where [2319] is link 'Byte Blaze'", "click [3596] where [359…
420	[Action Summary] ['None', "click [1152] where [1152] is img 'Byte Blaze'", "click [1527] where [1527] is link 'Edit profile'", 'type [1933] [Playing Badminton ] where [1933] is textbox "What\'s your status?" required: False', "click [1935] where [1935] is checkbox 'Set yourself as busy Displays that you are busy or not able to respond' checked: false", 'scroll [down3]', "click [1855] where [1855]…
420	[Action Summary] ['None', "click [1152] where [1152] is img 'Byte Blaze'", "click [1527] where [1527] is link 'Edit profile'", 'type [1933] [Playing Badminton ] where [1933] is textbox "What\'s your status?" required: False', "click [1935] where [1935] is checkbox 'Set yourself as busy Displays that you are busy or not able to respond' checked: false", 'scroll [down3]', "click [1855] where [1855]…
421	[Action Summary] ['None', "click [409] where [409] is link 'Byte Blaze'", "click [1533] where [1533] is button 'Set status'", 'type [1557] [Resting due to leg injury ] where [1557] is textbox "What\'s your status?" required: False', "click [1597] where [1597] is button 'Set status'", 'stop []']
422	[Action Summary] ['None', "click [1152] where [1152] is img 'Byte Blaze'", "click [1527] where [1527] is link 'Edit profile'", 'click [1933] where [1933] is textbox "What\'s your status?" required: False', 'type [1933] [Out of Office ] where [1933] is textbox "What\'s your status?" focused: True required: False', "click [2454] where [2454] is button '💬' hasPopup: menu expanded: False", 'scroll [d…
433	[Action Summary] ['None', "click [1475] where [1475] is button 'Add to Cart'", "click [2368] where [2368] is link 'shopping cart'", 'stop []']
433	[Action Summary] ['None', "click [1475] where [1475] is button 'Add to Cart'", "click [2368] where [2368] is link 'shopping cart'", 'stop []']
440	[Action Summary] ['None', "click [1261] where [1261] is link 'My Account'", "click [4220] where [4220] is link 'My Orders'", 'scroll [down]', "click [6370] where [6370] is combobox '' hasPopup: menu expanded: False", 'go_back', "click [8893] where [8893] is link 'My Orders'", 'press [PageDown]', 'press [PageDown]', 'press [Enter]', "click [11948] where [11948] is link '\\ue608 Page Next'", "click…
441	[Action Summary] ['None', "click [485] where [485] is link 'Settings'", "click [3501] where [3501] is link 'General'", "type [4957] [GIVE ME SPACE ] where [4957] is textbox 'Project name' required: False", "type [7053] [GIVE ME SPACE ] where [7053] is textbox 'Project name' required: False", "type [9151] [GIVE ME SPACE ] where [9151] is textbox '' required: False", 'scroll [up2]', "type [9149] [G…
447	[Action Summary] ['None', "click [1507] where [1507] is textbox 'Search GitLab' required: False", "type [1516] [a11y-webring.club ] where [1516] is searchbox 'Search GitLab' focused: True describedby: search-input-description", "click [2086] where [2086] is link 'Byte Blaze / a11y-webring.club'", "click [2667] where [2667] is link 'Issues'", "click [4685] where [4685] is tab 'All 10' selected: Fa…
448	[Action Summary] ['None', "click [1152] where [1152] is img 'Byte Blaze'", "click [1527] where [1527] is link 'Edit profile'", 'scroll [down2]', "type [2016] [https://egg.tart.com ] where [2016] is textbox 'Website url' required: False", 'scroll [down]', "type [1949] [Byte Blaze ] where [1949] is textbox 'Full name' required: True", "type [1972] [https://egg.tart.com ] where [1972] is textbox 'Em…
449	[Action Summary] ['None', "click [409] where [409] is link 'Byte Blaze'", "click [1527] where [1527] is link 'Edit profile'", 'scroll [down2]', "type [2016] [https://helloworld.xyz ] where [2016] is textbox 'Website url' required: False", 'scroll [down]', "type [1949] [Byte Blaze ] where [1949] is textbox 'Full name' required: True", "type [2016] [https://helloworld.xyz ] where [2016] is textbox …
450	[Action Summary] ['None', "click [409] where [409] is link 'Byte Blaze'", "click [1527] where [1527] is link 'Edit profile'", 'scroll [down2]', "type [2016] [a11yproject.contributor.me ] where [2016] is textbox 'Website url' required: False", 'scroll [down3]', "click [1855] where [1855] is button 'Update profile settings'", 'go_back', "click [2984] where [2984] is link 'Byte Blaze'", 'stop []']
450	[Action Summary] ['None', "click [409] where [409] is link 'Byte Blaze'", "click [1527] where [1527] is link 'Edit profile'", 'scroll [down2]', "type [2016] [a11yproject.contributor.me ] where [2016] is textbox 'Website url' required: False", 'scroll [down3]', "click [1855] where [1855] is button 'Update profile settings'", 'go_back', "click [2984] where [2984] is link 'Byte Blaze'", 'stop []']
452	[Action Summary] ['None', "click [409] where [409] is link 'Byte Blaze'", "click [1527] where [1527] is link 'Edit profile'", 'scroll [down2]', "type [2016] [byteblaze.github.io ] where [2016] is textbox 'Website url' required: False", 'press [Enter]', 'scroll [down2]', "type [2016] [byteblaze.github.io ] where [2016] is textbox 'Website url' focused: True required: False", 'scroll [down]', 'scro…
453	[Action Summary] ['None', "click [96] where [96] is link '\\ue608 CATALOG'", "click [317] where [317] is link 'Products'", "type [1270] [Teton ] where [1270] is textbox 'Search by keyword' required: False", "click [3537] where [3537] is link 'Edit Teton Pullover Hoodie-XS-Black'", 'scroll [down]', 'scroll [down]', 'scroll [up2]', "click [6565] where [6565] is checkbox '[website] Enable Product Ye…
458	[Action Summary] ['None', "click [16] where [16] is link '\\ue608 CATALOG'", 'scroll [down]', "click [543] where [543] is button 'Advanced Pricing'", "type [2693] [$27.00 ] where [2693] is textbox '[global] Price * $' required: False", "click [1047] where [1047] is button 'Save'", 'stop []']
459	[Action Summary] ['None', "click [16] where [16] is link '\\ue608 CATALOG'", "click [3069] where [3069] is link 'Products'", "type [3630] [ ] where [3630] is textbox 'Search by keyword' required: False", "click [3631] where [3631] is button 'Search'", "click [6189] where [6189] is gridcell 'Enabled' required: False", "type [11397] [62.10 ] where [11397] is textbox '[global] Price * $' disabled: T…
459	[Action Summary] ['None', "click [16] where [16] is link '\\ue608 CATALOG'", "click [3069] where [3069] is link 'Products'", "type [3630] [ ] where [3630] is textbox 'Search by keyword' required: False", "click [3631] where [3631] is button 'Search'", "click [6189] where [6189] is gridcell 'Enabled' required: False", "type [11397] [62.10 ] where [11397] is textbox '[global] Price * $' disabled: T…
460	[Action Summary] ['None', "click [16] where [16] is link '\\ue608 CATALOG'", "click [3035] where [3035] is link 'Products'", "type [3608] [Proteus Fitness Jackshirt-S-Black ] where [3608] is textbox 'Search by keyword' required: False", "click [6162] where [6162] is gridcell 'Proteus Fitness Jackshirt-S-Black' required: False", "type [11314] [38.25 ] where [11314] is textbox '[global] Price * $' …
466	[Action Summary] ['None', "click [1585] where [1585] is combobox '\\ue615 Search' autocomplete: both hasPopup: listbox required: False expanded: False", "type [1585] [Hawaiian Bamboo Orchid Roots #zc50 - by Discount Hawaiian Gifts ] where [1585] is combobox '\\ue615 Search' focused: True autocomplete: both hasPopup: listbox required: False expanded: True", 'scroll [down]', "click [4859] where [48…
467	[Action Summary] ['None', "click [1585] where [1585] is combobox '\\ue615 Search' autocomplete: both hasPopup: listbox required: False expanded: False", "type [1585] [HONGJ Hawaiian Beach Outfits Set for Mens, Summer Tropical Tree Printed Relaxed-fit Hawaii Shirts Shorts 2 Piece Suits ] where [1585] is combobox '\\ue615 Search' focused: True autocomplete: both hasPopup: listbox required: False ex…
467	[Action Summary] ['None', "click [1585] where [1585] is combobox '\\ue615 Search' autocomplete: both hasPopup: listbox required: False expanded: False", "type [1585] [HONGJ Hawaiian Beach Outfits Set for Mens, Summer Tropical Tree Printed Relaxed-fit Hawaii Shirts Shorts 2 Piece Suits ] where [1585] is combobox '\\ue615 Search' focused: True autocomplete: both hasPopup: listbox required: False ex…
468	[Action Summary] ['None', "click [1585] where [1585] is combobox '\\ue615 Search' autocomplete: both hasPopup: listbox required: False expanded: False", "type [1585] [DkRgVNY Lace Spcling Lingerie Women's Sexy Hollow Out Underwear Bodysuit One Piece Snap Crotch Clubwear Teddy Bodysuit ] where [1585] is combobox '\\ue615 Search' focused: True autocomplete: both hasPopup: listbox required: False ex…
470	[Action Summary] ['None', "click [90] where [90] is link '\\ue60b SALES'", "click [283] where [283] is link 'Orders'", "click [2323] where [2323] is button '\\ue605Filters'", "type [3200] [302 ] where [3200] is textbox 'ID' required: False", "click [3166] where [3166] is button 'Apply Filters'", 'go_back', 'scroll [down]', "click [4422] where [4422] is row 'http://metis.lti.cs.cmu.edu:7780/admin/…
475	[Action Summary] ['None', "click [401] where [401] is link 'Create new...'", "click [1520] where [1520] is link 'New project/repository'", "click [1673] where [1673] is link 'Create blank project Create a blank project to store your files, plan your work, and collaborate on code, among other things.'", "click [3128] where [3128] is textbox 'Project name' required: True", "type [3128] [chatgpt_plu…
477	[Action Summary] ['None', "click [305] where [305] is link 'New project'", "click [1653] where [1653] is link 'Create blank project Create a blank project to store your files, plan your work, and collaborate on code, among other things.'", "type [3108] [awesome_program_aided_reasoning ] where [3108] is textbox 'Project name' required: True", "click [3649] where [3649] is link 'Project information…
478	[Action Summary] ['None', "click [305] where [305] is link 'New project'", "click [1653] where [1653] is link 'Create blank project Create a blank project to store your files, plan your work, and collaborate on code, among other things.'", "type [3108] [webagent ] where [3108] is textbox 'Project name' required: True", "click [3423] where [3423] is button 'Copy project ID' live: polite atomic: Fa…
478	[Action Summary] ['None', "click [305] where [305] is link 'New project'", "click [1653] where [1653] is link 'Create blank project Create a blank project to store your files, plan your work, and collaborate on code, among other things.'", "type [3108] [webagent ] where [3108] is textbox 'Project name' required: True", "click [3423] where [3423] is button 'Copy project ID' live: polite atomic: Fa…
479	[Action Summary] ['None', "click [305] where [305] is link 'New project'", "click [1653] where [1653] is link 'Create blank project Create a blank project to store your files, plan your work, and collaborate on code, among other things.'", "click [3108] where [3108] is textbox 'Project name' required: True", "type [3108] [awesome_webagent ] where [3108] is textbox 'Project name' focused: True req…
480	[Action Summary] ['None', "click [1507] where [1507] is textbox 'Search GitLab' required: False", "type [1516] [solarized-prism-theme ] where [1516] is searchbox 'Search GitLab' focused: True describedby: search-input-description", "click [2099] where [2099] is link 'Byte Blaze / solarized-prism-theme'", "click [2735] where [2735] is link 'Settings'", "click [4318] where [4318] is link 'Project i…
481	[Action Summary] ['None', "click [694] where [694] is link 'Byte Blaze / dotfiles'", "click [2385] where [2385] is link 'Project information'", "click [5725] where [5725] is link 'Members'", 'press [Enter]', "click [6067] where [6067] is button 'Invite members'", 'press [Enter]', 'scroll [down]', "type [6981] [Abishek ] where [6981] is textbox 'Username or email address' focused: True required: F…
482	[Action Summary] ['None', "click [694] where [694] is link 'Byte Blaze / dotfiles'", "click [2385] where [2385] is link 'Project information'", "click [5725] where [5725] is link 'Members'", 'press [Enter]', "click [6067] where [6067] is button 'Invite members'", 'press [Enter]', 'scroll [down]', "type [6981] [yjlou ] where [6981] is textbox 'Username or email address' focused: True required: Fal…
482	[Action Summary] ['None', "click [694] where [694] is link 'Byte Blaze / dotfiles'", "click [2385] where [2385] is link 'Project information'", "click [5725] where [5725] is link 'Members'", 'press [Enter]', "click [6067] where [6067] is button 'Invite members'", 'press [Enter]', 'scroll [down]', "type [6981] [yjlou ] where [6981] is textbox 'Username or email address' focused: True required: Fal…
483	[Action Summary] ['None', "click [694] where [694] is link 'Byte Blaze / dotfiles'", "click [2385] where [2385] is link 'Project information'", "click [5725] where [5725] is link 'Members'", 'press [Enter]', "click [6067] where [6067] is button 'Invite members'", 'press [Enter]', "type [6981] [Koushik ] where [6981] is textbox 'Username or email address' focused: True required: False describedby:…
484	[Action Summary] ['None', "click [694] where [694] is link 'Byte Blaze / dotfiles'", "click [2385] where [2385] is link 'Project information'", "click [5725] where [5725] is link 'Members'", 'press [Enter]', "click [6067] where [6067] is button 'Invite members'", 'press [Enter]', "click [6984] where [6984] is combobox 'Select a role' hasPopup: menu expanded: False describedby: __BVID__279__BV_des…
485	[Action Summary] ['None', 'scroll [down]', "click [743] where [743] is link 'Byte Blaze / dotfiles'", "click [2451] where [2451] is link 'Project information'", "click [5791] where [5791] is link 'Members'", "click [6133] where [6133] is button 'Invite members'", "click [7047] where [7047] is textbox 'Username or email address' focused: True required: False describedby: __BVID__271__BV_descriptio…
486	[Action Summary] ['None', "click [114] where [114] is link '\\ue602 CONTENT'", "click [442] where [442] is link 'Pages'", "stop [there's no item matching the requirement.]"]
486	[Action Summary] ['None', "click [114] where [114] is link '\\ue602 CONTENT'", "click [442] where [442] is link 'Pages'", "type [1262] [404 Not Found ] where [1262] is textbox 'Search by keyword' required: False", "click [1263] where [1263] is button 'Search'", "click [3111] where [3111] is button 'Select'", "click [3111] where [3111] is button 'Select' focused: True", "click [3111] where [3111] …
487	[Action Summary] ['None', "click [114] where [114] is link '\\ue602 CONTENT'", "click [454] where [454] is link 'Pages'", "click [2252] where [2252] is button '\\ue605Filters'", "click [2859] where [2859] is button 'Clear all'", "type [1248] [enable cookies ] where [1248] is textbox 'Search by keyword' required: False", 'scroll [down]', "click [3288] where [3288] is gridcell 'Enable Cookies' requ…
487	[Action Summary] ['None', "click [114] where [114] is link '\\ue602 CONTENT'", "click [454] where [454] is link 'Pages'", "click [2252] where [2252] is button '\\ue605Filters'", "click [2859] where [2859] is button 'Clear all'", "type [1248] [enable cookies ] where [1248] is textbox 'Search by keyword' required: False", 'scroll [down]', "click [3288] where [3288] is gridcell 'Enable Cookies' requ…
488	[Action Summary] ['None', "click [114] where [114] is link '\\ue602 CONTENT'", "click [454] where [454] is link 'Pages'", 'scroll [down]', "type [1248] [Home Page ] where [1248] is textbox 'Search by keyword' required: False", "click [4440] where [4440] is gridcell 'Home Page' required: False", "click [4494] where [4494] is gridcell 'Home Page' required: False", "click [4496] where [4496] is text…
489	[Action Summary] ['None', "click [114] where [114] is link '\\ue602 CONTENT'", "click [454] where [454] is link 'Pages'", 'scroll [down]', "type [1248] [Privacy Policy ] where [1248] is textbox 'Search by keyword' required: False", "click [1285] where [1285] is gridcell 'Privacy Policy' required: False", 'scroll [down]', "click [3209] where [3209] is textbox '' required: False", "type [3209] [No …
490	[Action Summary] ['None', "click [114] where [114] is link '\\ue602 CONTENT'", "click [454] where [454] is link 'Pages'", "click [2875] where [2875] is button 'Clear all'", 'scroll [down]', "type [1279] [About us ] where [1279] is table ''", "click [3323] where [3323] is checkbox '' checked: false", "click [4523] where [4523] is gridcell '5' required: False", "click [4502] where [4502] is textbox…
491	[Action Summary] ['None', "click [90] where [90] is link '\\ue60b SALES'", "click [295] where [295] is link 'Orders'", "click [2782] where [2782] is button 'Clear all'", "type [1248] [Sarah Miller ] where [1248] is textbox 'Search by keyword' required: False", "click [2788] where [2788] is columnheader '↑ Purchase Date' required: False", 'scroll [down2]', "click [6095] where [6095] is link 'View'…
491	[Action Summary] ['None', "click [90] where [90] is link '\\ue60b SALES'", "click [295] where [295] is link 'Orders'", "click [2782] where [2782] is button 'Clear all'", "type [1248] [Sarah Miller ] where [1248] is textbox 'Search by keyword' required: False", "click [2788] where [2788] is columnheader '↑ Purchase Date' required: False", 'scroll [down2]', "click [6095] where [6095] is link 'View'…
496	[Action Summary] ['None', "click [90] where [90] is link '\\ue60b SALES'", "click [295] where [295] is link 'Orders'", "click [1248] where [1248] is textbox 'Search by keyword' required: False", "type [1248] [299 ] where [1248] is textbox 'Search by keyword' focused: True required: False", "click [1249] where [1249] is button 'Search'", "click [2743] where [2743] is button 'Clear all'", "click [3…
513	[Action Summary] ['None', "click [850] where [850] is menuitem '\\ue622 Home & Kitchen' hasPopup: menu", 'scroll [down]', "click [4881] where [4881] is img 'Image'", "click [6639] where [6639] is link 'Add to Wish List'", 'stop []']
513	[Action Summary] ['None', "click [850] where [850] is menuitem '\\ue622 Home & Kitchen' hasPopup: menu", 'scroll [down]', "click [4881] where [4881] is img 'Image'", "click [6639] where [6639] is link 'Add to Wish List'", 'stop []']
516	[Action Summary] ['None', "click [1276] where [1276] is link 'Add to Wish List'", 'stop []']
517	[Action Summary] ['None', "click [1277] where [1277] is link 'Add to Wish List'", 'stop []']
517	[Action Summary] ['None', "click [1277] where [1277] is link 'Add to Wish List'", 'stop []']
518	[Action Summary] ['None', "click [1277] where [1277] is link 'Add to Wish List'", 'stop []']
519	[Action Summary] ['None', 'scroll [down2]', "click [1283] where [1283] is link 'Add to Wish List'", 'stop []']
520	[Action Summary] ['None', 'scroll [down]', "click [1280] where [1280] is link 'Add to Wish List'", 'stop []']
521	[Action Summary] ['None', 'scroll [down3]', "click [1580] where [1580] is textbox 'Sign Up for Our Newsletter:' required: False", "type [1580] [emma.lopez@gmail.com ] where [1580] is textbox 'Sign Up for Our Newsletter:' focused: True required: False", 'scroll [down3]', "click [4106] where [4106] is button 'Subscribe'", 'stop []']
527	[Action Summary] ['None', "click [413] where [413] is link 'Explore'", "click [1974] where [1974] is link 'Most stars'", "click [4017] where [4017] is heading 'Umano: News Read To You / AndroidSlidingUpPanel'", "click [5825] where [5825] is button 'Star'", 'stop []']
533	[Action Summary] ['None', 'scroll [down]', "click [1712] where [1712] is textbox 'Search GitLab' required: False", "type [1721] [convexegg ] where [1721] is searchbox 'Search GitLab' focused: True describedby: search-input-description", "click [2277] where [2277] is link 'Users 1'", "click [2822] where [2822] is link 'Convex Eggtart @convexegg'", "click [3802] where [3802] is button 'Unfollow'", …
534	[Action Summary] ['None', "click [1507] where [1507] is textbox 'Search GitLab' required: False", "type [1516] [Jakub Klinkovský ] where [1516] is searchbox 'Search GitLab' focused: True describedby: search-input-description", "click [2068] where [2068] is link 'Users 1'", "click [2609] where [2609] is link 'Jakub Klinkovský @lahwaacz'", "click [3582] where [3582] is button 'Follow'", "type [5206…
534	[Action Summary] ['None', "click [1507] where [1507] is textbox 'Search GitLab' required: False", "type [1516] [Jakub Klinkovský ] where [1516] is searchbox 'Search GitLab' focused: True describedby: search-input-description", "click [2068] where [2068] is link 'Users 1'", "click [2609] where [2609] is link 'Jakub Klinkovský @lahwaacz'", "click [3582] where [3582] is button 'Follow'", "type [5206…
535	[Action Summary] ['None', "click [1507] where [1507] is textbox 'Search GitLab' required: False", "type [1516] [Jakub K ] where [1516] is searchbox 'Search GitLab' focused: True describedby: search-input-description", "click [2070] where [2070] is link 'Users 3'", "click [2621] where [2621] is link 'Jakub Klinkovský @lahwaacz'", "click [3613] where [3613] is button 'Follow'", "click [5366] where …
536	[Action Summary] ['None', "click [1507] where [1507] is textbox 'Search GitLab' required: False", "type [1516] [ghost ] where [1516] is searchbox 'Search GitLab' focused: True describedby: search-input-description", "click [2070] where [2070] is link 'Users 2'", "click [2623] where [2623] is link 'Ghost User @ghost'", "click [3074] where [3074] is button 'Follow'", "type [3554] [R1kk3r ] where [3…
537	[Action Summary] ['None', "click [1507] where [1507] is textbox 'Search GitLab' required: False", "type [1516] [Jakub Klinkovsk ] where [1516] is searchbox 'Search GitLab' focused: True describedby: search-input-description", "click [2070] where [2070] is link 'Users 1'", "click [2611] where [2611] is link 'Jakub Klinkovský @lahwaacz'", "click [3590] where [3590] is button 'Follow'", 'scroll [dow…
538	[Action Summary] ['None', "click [90] where [90] is link '\\ue60b SALES'", "click [295] where [295] is link 'Orders'", "click [6348] where [6348] is button '\\ue605Filters'", "click [1249] where [1249] is button 'Search'", "type [12933] [299 ] where [12933] is textbox 'ID' required: False", "click [12856] where [12856] is button 'Apply Filters'", "click [8141] where [8141] is link 'View'", "click…
539	[Action Summary] ['None', "click [90] where [90] is link '\\ue60b SALES'", "click [283] where [283] is link 'Orders'", "click [2328] where [2328] is button '\\ue605Filters'", "click [2971] where [2971] is button '\\ue620'", "type [3235] [65 ] where [3235] is textbox 'ID' required: False", "click [3176] where [3176] is button 'Apply Filters'", 'scroll [down]', "click [5949] where [5949] is link 'V…
539	[Action Summary] ['None', "click [90] where [90] is link '\\ue60b SALES'", "click [283] where [283] is link 'Orders'", "click [2328] where [2328] is button '\\ue605Filters'", "click [2971] where [2971] is button '\\ue620'", "type [3235] [65 ] where [3235] is textbox 'ID' required: False", "click [3176] where [3176] is button 'Apply Filters'", 'scroll [down]', "click [5949] where [5949] is link 'V…
547	[Action Summary] ['None', "click [96] where [96] is link '\\ue608 CATALOG'", "click [317] where [317] is link 'Products'", "type [1262] [Phoebe Zipper Sweatshirt ] where [1262] is textbox 'Search by keyword' required: False", "click [1441] where [1441] is gridcell 'Phoebe Zipper Sweatshirt' required: False", "click [1395] where [1395] is link 'Edit Phoebe Zipper Sweatshirt'", "click [4349] where …
547	[Action Summary] ['None', "click [96] where [96] is link '\\ue608 CATALOG'", "click [317] where [317] is link 'Products'", "type [1262] [Phoebe Zipper Sweatshirt ] where [1262] is textbox 'Search by keyword' required: False", "click [1441] where [1441] is gridcell 'Phoebe Zipper Sweatshirt' required: False", "click [1395] where [1395] is link 'Edit Phoebe Zipper Sweatshirt'", "click [4349] where …
571	[Action Summary] ['None', "click [1261] where [1261] is link 'My Account'", "click [3887] where [3887] is link 'Manage Addresses'", "click [6254] where [6254] is link 'Change Shipping Address'", "type [8533] [231 Willow Way ] where [8533] is textbox 'Street Address* Street Address: Line 1' required: True", "click [10916] where [10916] is link 'Change Billing Address'", 'scroll [down]', "click [13…
572	[Action Summary] ['None', "click [1256] where [1256] is link 'My Account'", 'scroll [down]', "click [3896] where [3896] is link 'Edit Address'", "type [6306] [654 Aspen Road, House #3, Boston, MA, 02110 ] where [6306] is textbox 'Street Address* Street Address: Line 1' required: True", 'scroll [down]', "click [8711] where [8711] is button 'Add New Address'", 'scroll [down]', "click [10906] where …
572	[Action Summary] ['None', "click [1256] where [1256] is link 'My Account'", 'scroll [down]', "click [3896] where [3896] is link 'Edit Address'", "type [6306] [654 Aspen Road, House #3, Boston, MA, 02110 ] where [6306] is textbox 'Street Address* Street Address: Line 1' required: True", 'scroll [down]', "click [8711] where [8711] is button 'Add New Address'", 'scroll [down]', "click [10906] where …
573	[Action Summary] ['None', "click [1256] where [1256] is link 'My Account'", "click [4169] where [4169] is link 'Address Book'", "click [6150] where [6150] is link 'Change Billing Address'", 'scroll [down]', "click [8367] where [8367] is button 'Save Address'", "click [10800] where [10800] is heading 'Address Book'", 'scroll [down]', 'go_back', "type [13139] [987 Sycamore Circle, Philadelphia, PA,…
574	[Action Summary] ['None', "click [1256] where [1256] is link 'My Account'", "click [4174] where [4174] is link 'Account Information'", 'scroll [down]', 'go_back', 'scroll [down]', "click [8369] where [8369] is link 'Edit Address'", "type [10781] [111 Magnolia Path, Atlanta, GA, 30303 ] where [10781] is textbox 'Street Address* Street Address: Line 1' required: True", "click [13182] where [13182] …
576	[Action Summary] ['None', "click [1507] where [1507] is textbox 'Search GitLab' required: False", "type [1516] [a11y-webring.club ] where [1516] is searchbox 'Search GitLab' focused: True describedby: search-input-description", "click [2086] where [2086] is link 'Byte Blaze / a11y-webring.club'", "click [2689] where [2689] is link 'Settings'", "click [4801] where [4801] is link 'Project informati…
578	[Action Summary] ['None', "click [1507] where [1507] is textbox 'Search GitLab' required: False", "type [1516] [millennials-to-snake-people ] where [1516] is searchbox 'Search GitLab' focused: True describedby: search-input-description", "click [2086] where [2086] is link 'Byte Blaze / millennials-to-snake-people'", 'press [Enter]', "click [2735] where [2735] is link 'Settings'", "click [4574] wh…
579	[Action Summary] ['None', "click [1507] where [1507] is textbox 'Search GitLab' required: False", "type [1516] [timeit ] where [1516] is searchbox 'Search GitLab' focused: True describedby: search-input-description", "click [2099] where [2099] is link 'Byte Blaze / timeit'", "click [2754] where [2754] is link 'CI/CD'", "click [5130] where [5130] is link 'Editor'", "click [5457] where [5457] is li…
580	[Action Summary] ['None', "click [65] where [65] is link 'Forums'", "click [290] where [290] is link 'Create forum'", "type [1273] [sci_fi ] where [1273] is textbox 'Name *' required: True", "type [1276] [A wild place for sci-fi enthusiasts ] where [1276] is textbox 'Title *' focused: True required: True", "type [1284] [A wild place for sci-fi enthusiasts ] where [1284] is textbox 'Description *'…
581	[Action Summary] ['None', "click [12] where [12] is button 'MarvelsGrantMan136' hasPopup: menu expanded: False", "click [275] where [275] is link ' My account'", 'go_back', "click [616] where [616] is link 'Forums'", "click [841] where [841] is link 'Create forum'", "type [1824] [cmu_lti ] where [1824] is textbox 'Name *' required: True", "type [1827] [Language Technologies Institute at Carnegie …
581	[Action Summary] ['None', "click [12] where [12] is button 'MarvelsGrantMan136' hasPopup: menu expanded: False", "click [275] where [275] is link ' My account'", 'go_back', "click [616] where [616] is link 'Forums'", "click [841] where [841] is link 'Create forum'", "type [1824] [cmu_lti ] where [1824] is textbox 'Name *' required: True", "type [1827] [Language Technologies Institute at Carnegie …
582	[Action Summary] ['None', "click [65] where [65] is link 'Forums'", "click [290] where [290] is link 'Create forum'", "type [1273] [Cyberpunk ] where [1273] is textbox 'Name *' required: True", "type [1276] [Cyberpunk ] where [1276] is textbox 'Title *' focused: True required: True", "type [1284] [Welcome to the future ] where [1284] is textbox 'Description *' focused: True required: True describ…
583	[Action Summary] ['None', "click [65] where [65] is link 'Forums'", "click [290] where [290] is link 'Create forum'", 'scroll [down]', "type [1273] [PlantsForCatParents ] where [1273] is textbox 'Name *' required: True", "type [1276] [Cat parents & plant lovers ] where [1276] is textbox 'Title *' focused: True required: True", "type [1284] [Cat parents & plant lovers ] where [1284] is textbox 'De…
584	[Action Summary] ['None', "click [65] where [65] is link 'Forums'", "click [290] where [290] is link 'Create forum'", "type [1273] [Karaoke ] where [1273] is textbox 'Name *' required: True", "type [1276] [Place for Karaoke lovers ] where [1276] is textbox 'Title *' focused: True required: True", "type [1284] [Place for Karaoke lovers ] where [1284] is textbox 'Description *' focused: True requir…
590	[Action Summary] ['None', "click [468] where [468] is link 'Issues'", "click [4231] where [4231] is link 'Milestones'", 'press [Enter]', "click [4675] where [4675] is link 'New milestone'", 'press [Enter]', "type [5323] [Product Launch ] where [5323] is textbox 'Title' required: True", "click [5574] where [5574] is textbox 'Start Date' required: False", 'press [PageDown]', "click [6546] where [65…
593	[Action Summary] ['None', "click [876] where [876] is link 'Issues'", "click [4302] where [4302] is link 'Milestones'", "click [4622] where [4622] is link 'New milestone'", 'press [Enter]', "type [5333] [Merging all branches to main ] where [5333] is textbox 'Title' required: True", "click [5590] where [5590] is textbox 'Start Date' required: False", "click [6620] where [6620] is button '15'", "c…
595	[Action Summary] ['None', "click [65] where [65] is link 'Forums'", 'scroll [down3]', "click [632] where [632] is link 'space — space'", "click [1222] where [1222] is button 'Sort by: Hot' hasPopup: menu expanded: False", "click [3010] where [3010] is link 'New'", "click [3714] where [3714] is link 'Scientists erupt at NASA gutting funding for crucial Venus mission'", "click [5055] where [5055] i…
596	[Action Summary] ['None', "click [65] where [65] is link 'Forums'", 'scroll [down3]', "click [592] where [592] is link 'books — books'", "click [1886] where [1886] is link 'The letters of T. S. Eliot to Emily Hale that were kept sealed from 1956 to 2020 have been released for free online'", "click [2322] where [2322] is button 'Subscribe No subscribers'", 'stop []']
597	[Action Summary] ['None', "click [65] where [65] is link 'Forums'", 'scroll [down3]', "click [981] where [981] is link 'Next'", 'scroll [down3]', "click [1939] where [1939] is link 'Next'", 'scroll [down2]', "click [2498] where [2498] is link 'consoles — consoles'", "click [3138] where [3138] is button 'Sort by: Hot' hasPopup: menu expanded: False", "click [4916] where [4916] is link '• Hot'", "c…
597	[Action Summary] ['None', "click [65] where [65] is link 'Forums'", 'scroll [down3]', "click [981] where [981] is link 'Next'", 'scroll [down3]', "click [1939] where [1939] is link 'Next'", 'scroll [down2]', "click [2498] where [2498] is link 'consoles — consoles'", "click [3138] where [3138] is button 'Sort by: Hot' hasPopup: menu expanded: False", "click [4916] where [4916] is link '• Hot'", "c…
601	[Action Summary] ['None', "click [76] where [76] is link 'Submit'", "click [263] where [263] is combobox 'Choose one…' hasPopup: menu required: False expanded: False", 'type', "type [333] [is car necessary in NYC ] where [333] is textbox 'Title *' required: True", "type [343] [I am moving to NYC soon and was wondering if a car is necessary there. I would like to hear your thoughts. Thanks! ] wher…
601	[Action Summary] ['None', "click [76] where [76] is link 'Submit'", "click [263] where [263] is combobox 'Choose one…' hasPopup: menu required: False expanded: False", 'type', "type [333] [is car necessary in NYC ] where [333] is textbox 'Title *' required: True", "type [343] [I am moving to NYC soon and was wondering if a car is necessary there. I would like to hear your thoughts. Thanks! ] wher…
602	[Action Summary] ['None', "click [76] where [76] is link 'Submit'", "click [263] where [263] is combobox 'Choose one…' hasPopup: menu required: False expanded: False", 'type', "click [333] where [333] is textbox 'Title *' required: True", "type [333] [places for new drivers to learn driving in pittsburgh ] where [333] is textbox 'Title *' focused: True required: True", "click [343] where [343] is…
603	[Action Summary] ['None', "click [76] where [76] is link 'Submit'", "click [263] where [263] is combobox 'Choose one…' hasPopup: menu required: False expanded: False", 'type', "click [333] where [333] is textbox 'Title *' required: True", "type [333] [safe and budget apartment to live in nyc ] where [333] is textbox 'Title *' focused: True required: True", "click [343] where [343] is textbox 'Bod…
605	[Action Summary] ['None', "click [65] where [65] is link 'Forums'", 'scroll [down3]', "click [981] where [981] is link 'Next'", 'scroll [down3]', "click [1939] where [1939] is link 'Next'", 'scroll [down2]', "click [2498] where [2498] is link 'consoles — consoles'", "click [3371] where [3371] is link 'Submit'", "type [5006] [What is the recommended console to buy these days ] where [5006] is text…
605	[Action Summary] ['None', "click [65] where [65] is link 'Forums'", 'scroll [down3]', "click [981] where [981] is link 'Next'", 'scroll [down3]', "click [1939] where [1939] is link 'Next'", 'scroll [down2]', "click [2498] where [2498] is link 'consoles — consoles'", "click [3371] where [3371] is link 'Submit'", "type [5006] [What is the recommended console to buy these days ] where [5006] is text…
606	[Action Summary] ['None', "click [76] where [76] is link 'Submit'", "click [263] where [263] is combobox 'Choose one…' hasPopup: menu required: False expanded: False", 'type', "type [333] [is car necessary ] where [333] is textbox 'Title *' required: True", "type [343] [is car necessary ] where [343] is textbox 'Body' required: False describedby: submission_body_help", 'scroll [down]', "click [46…
607	[Action Summary] ['None', "click [65] where [65] is link 'Forums'", 'scroll [down3]', "click [981] where [981] is link 'Next'", 'scroll [down]', "click [1460] where [1460] is link 'pittsburgh — pittsburgh'", "click [2413] where [2413] is link 'Submit'", "type [4045] [places for new drivers to learn driving ] where [4045] is textbox 'Title *' required: True", "type [4055] [places for new drivers t…
609	[Action Summary] ['None', "click [76] where [76] is link 'Submit'", "click [263] where [263] is combobox 'Choose one…' hasPopup: menu required: False expanded: False", 'type', "click [333] where [333] is textbox 'Title *' required: True", "type [333] [what is the SOTA web navigation agent repo ] where [333] is textbox 'Title *' focused: True required: True", "click [343] where [343] is textbox 'B…
610	[Action Summary] ['None', "click [76] where [76] is link 'Submit'", "click [263] where [263] is combobox 'Choose one…' hasPopup: menu required: False expanded: False", 'type', "click [333] where [333] is textbox 'Title *' required: True", "type [333] [To Kill a Mockingbird by Harper Lee ] where [333] is textbox 'Title *' focused: True required: True", "click [343] where [343] is textbox 'Body' re…
611	[Action Summary] ['None', "click [76] where [76] is link 'Submit'", "click [263] where [263] is combobox 'Choose one…' hasPopup: menu required: False expanded: False", 'type', "click [333] where [333] is textbox 'Title *' required: True", "type [333] [Harry Potter ] where [333] is textbox 'Title *' focused: True required: True", "click [343] where [343] is textbox 'Body' required: False described…
611	[Action Summary] ['None', "click [76] where [76] is link 'Submit'", "click [263] where [263] is combobox 'Choose one…' hasPopup: menu required: False expanded: False", 'type', "click [333] where [333] is textbox 'Title *' required: True", "type [333] [Harry Potter ] where [333] is textbox 'Title *' focused: True required: True", "click [343] where [343] is textbox 'Body' required: False described…
612	[Action Summary] ['None', "click [76] where [76] is link 'Submit'", "click [263] where [263] is combobox 'Choose one…' hasPopup: menu required: False expanded: False", 'type', "click [333] where [333] is textbox 'Title *' required: True", "type [333] [big little lies ] where [333] is textbox 'Title *' focused: True required: True", "click [343] where [343] is textbox 'Body' required: False descri…
613	[Action Summary] ['None', "click [76] where [76] is link 'Submit'", "click [263] where [263] is combobox 'Choose one…' hasPopup: menu required: False expanded: False", 'type', "type [333] [Love story ] where [333] is textbox 'Title *' required: True", "type [343] [I cried ] where [343] is textbox 'Body' required: False describedby: submission_body_help", 'scroll [down]', "click [460] where [460] …
614	[Action Summary] ['None', "click [76] where [76] is link 'Submit'", "click [263] where [263] is combobox 'Choose one…' hasPopup: menu required: False expanded: False", 'type', "click [333] where [333] is textbox 'Title *' required: True", "type [333] [Gone with the wind ] where [333] is textbox 'Title *' focused: True required: True", "type [343] [It's a book with history ] where [343] is textbox…
620	[Action Summary] ['None', "click [76] where [76] is link 'Submit'", "click [263] where [263] is combobox 'Choose one…' hasPopup: menu required: False expanded: False", 'type', "click [333] where [333] is textbox 'Title *' required: True", "type [333] [Advice on dealing with long-distance relationships ] where [333] is textbox 'Title *' focused: True required: True", "type [343] [Can anyone share …
621	[Action Summary] ['None', "click [76] where [76] is link 'Submit'", "click [263] where [263] is combobox 'Choose one…' hasPopup: menu required: False expanded: False", 'type', "type [333] [Advice needed: cheating issues ] where [333] is textbox 'Title *' required: True", "type [343] [Can someone give me advice about dealing with a partner who cheats? ] where [343] is textbox 'Body' required: Fals…
621	[Action Summary] ['None', "click [76] where [76] is link 'Submit'", "click [263] where [263] is combobox 'Choose one…' hasPopup: menu required: False expanded: False", 'type', "type [333] [Advice needed: cheating issues ] where [333] is textbox 'Title *' required: True", "type [343] [Can someone give me advice about dealing with a partner who cheats? ] where [343] is textbox 'Body' required: Fals…
622	[Action Summary] ['None', "click [65] where [65] is link 'Forums'", "click [402] where [402] is link 'relationship_advice — relationship_advice'", "click [1455] where [1455] is link 'Submit'", "type [3063] [Advice about sexual harassment ] where [3063] is textbox 'Title *' required: True", "type [3073] [I am a 28 year old woman, my boyfriend is a 30 year old man. We have been dating for over 2 ye…
623	[Action Summary] ['None', "click [76] where [76] is link 'Submit'", "click [263] where [263] is combobox 'Choose one…' hasPopup: menu required: False expanded: False", 'type', "click [333] where [333] is textbox 'Title *' required: True", "type [333] [Advice for Birthday Gift ] where [333] is textbox 'Title *' focused: True required: True", "click [343] where [343] is textbox 'Body' required: Fal…
624	[Action Summary] ['None', "click [76] where [76] is link 'Submit'", "click [263] where [263] is combobox 'Choose one…' hasPopup: menu required: False expanded: False", 'type', "click [333] where [333] is textbox 'Title *' required: True", "type [333] [Need Advice on Break-up Remedy ] where [333] is textbox 'Title *' focused: True required: True", "click [343] where [343] is textbox 'Body' require…
625	[Action Summary] ['None', "click [76] where [76] is link 'Submit'", "type [333] [the effectiveness of online learning ] where [333] is textbox 'Title *' required: True", "type [343] [your opinion ] where [343] is textbox 'Body' required: False describedby: submission_body_help", 'scroll [down]', "click [263] where [263] is combobox 'Choose one…' hasPopup: menu required: False expanded: False", 't…
626	[Action Summary] ['None', "click [76] where [76] is link 'Submit'", "click [263] where [263] is combobox 'Choose one…' hasPopup: menu required: False expanded: False", 'type', "type [333] [Iphone 14 ] where [333] is textbox 'Title *' required: True", "type [343] [your opinion ] where [343] is textbox 'Body' required: False describedby: submission_body_help", 'scroll [down]', "click [460] where [4…
626	[Action Summary] ['None', "click [76] where [76] is link 'Submit'", "click [263] where [263] is combobox 'Choose one…' hasPopup: menu required: False expanded: False", 'type', "type [333] [Iphone 14 ] where [333] is textbox 'Title *' required: True", "type [343] [your opinion ] where [343] is textbox 'Body' required: False describedby: submission_body_help", 'scroll [down]', "click [460] where [4…
627	[Action Summary] ['None', "click [76] where [76] is link 'Submit'", "click [263] where [263] is combobox 'Choose one…' hasPopup: menu required: False expanded: False", 'type', "type [333] [Harry Potter movie series ] where [333] is textbox 'Title *' required: True", "type [343] [your opinion ] where [343] is textbox 'Body' required: False describedby: submission_body_help", 'scroll [down]', "clic…
628	[Action Summary] ['None', "click [76] where [76] is link 'Submit'", "click [263] where [263] is combobox 'Choose one…' hasPopup: menu required: False expanded: False", 'type', "click [333] where [333] is textbox 'Title *' required: True", "type [333] [long distance relationship ] where [333] is textbox 'Title *' focused: True required: True", "type [343] [your opinion ] where [343] is textbox 'Bo…
629	[Action Summary] ['None', "click [76] where [76] is link 'Submit'", "type [333] [Fun thing to do in Pittsburgh ] where [333] is textbox 'Title *' required: True", "click [263] where [263] is combobox 'Choose one…' hasPopup: menu required: False expanded: False", 'type', "type [343] [your opinion ] where [343] is textbox 'Body' required: False describedby: submission_body_help", 'scroll [down]', "…
630	[Action Summary] ['None', "click [76] where [76] is link 'Submit'", "click [263] where [263] is combobox 'Choose one…' hasPopup: menu required: False expanded: False", 'type', "type [333] [Looking for product recommendations for noise-cancelling headphones within a budget of $200 ] where [333] is textbox 'Title *' required: True", 'scroll [down]', "type [343] [Please provide recommendations for n…
631	[Action Summary] ['None', "click [76] where [76] is link 'Submit'", 'scroll [down]', "click [263] where [263] is combobox 'Choose one…' hasPopup: menu required: False expanded: False", 'type', "click [333] where [333] is textbox 'Title *' required: True", "type [333] [Product recommendations for running shoes within a budget of $100 ] where [333] is textbox 'Title *' focused: True required: True"…
631	[Action Summary] ['None', "click [76] where [76] is link 'Submit'", 'scroll [down]', "click [263] where [263] is combobox 'Choose one…' hasPopup: menu required: False expanded: False", 'type', "click [333] where [333] is textbox 'Title *' required: True", "type [333] [Product recommendations for running shoes within a budget of $100 ] where [333] is textbox 'Title *' focused: True required: True"…
632	[Action Summary] ['None', "click [76] where [76] is link 'Submit'", "type [333] [Product Recommendations for Running Shoes ] where [333] is textbox 'Title *' required: True", "click [263] where [263] is combobox 'Choose one…' hasPopup: menu required: False expanded: False", 'type', "type [343] [I am looking for product recommendations for running shoes with a budget of $500. Any suggestions? ] wh…
633	[Action Summary] ['None', "click [76] where [76] is link 'Submit'", "click [263] where [263] is combobox 'Choose one…' hasPopup: menu required: False expanded: False", 'type', "click [333] where [333] is textbox 'Title *' required: True", "type [333] [Product Recommendations for Running Pants ] where [333] is textbox 'Title *' focused: True required: True", "click [343] where [343] is textbox 'Bo…
634	[Action Summary] ['None', "click [76] where [76] is link 'Submit'", "click [263] where [263] is combobox 'Choose one…' hasPopup: menu required: False expanded: False", 'type', "click [333] where [333] is textbox 'Title *' required: True", "type [333] [Product recommendations for used iPhone within $1000 budget ] where [333] is textbox 'Title *' focused: True required: True", "type [343] [Can anyo…
635	[Action Summary] ['None', "click [76] where [76] is link 'Submit'", "type [333] [Recommendations for Noise-Cancelling Headphones ] where [333] is textbox 'Title *' required: True", "type [343] [Can anyone recommend noise-cancelling headphones products within a budget of $200? ] where [343] is textbox 'Body' required: False describedby: submission_body_help", 'scroll [down]', "click [263] where [2…
636	[Action Summary] ['None', "click [76] where [76] is link 'Submit'", "click [263] where [263] is combobox 'Choose one…' hasPopup: menu required: False expanded: False", 'type', "type [333] [Recommendations for DIY toolkit products within $100? ] where [333] is textbox 'Title *' required: True", "type [343] [Can anyone suggest good DIY toolkit products that stay within a budget of $100? ] where [34…
637	[Action Summary] ['None', "click [65] where [65] is link 'Forums'", 'scroll [down3]', "click [981] where [981] is link 'Next'", 'scroll [down3]', "click [1580] where [1580] is link 'headphones — headphones'", "click [2413] where [2413] is link 'Submit'", "type [4046] [Recommendations for Sony headphones under $500 ] where [4046] is textbox 'Title *' required: True", "type [4056] [I am looking for…
637	[Action Summary] ['None', "click [65] where [65] is link 'Forums'", 'scroll [down3]', "click [981] where [981] is link 'Next'", 'scroll [down3]', "click [1580] where [1580] is link 'headphones — headphones'", "click [2413] where [2413] is link 'Submit'", "type [4046] [Recommendations for Sony headphones under $500 ] where [4046] is textbox 'Title *' required: True", "type [4056] [I am looking for…
638	[Action Summary] ['None', "click [65] where [65] is link 'Forums'", 'scroll [down3]', "click [981] where [981] is link 'Next'", "click [1340] where [1340] is searchbox 'Search query'", "type [1340] [products ] where [1340] is searchbox 'Search query' focused: True", "click [2583] where [2583] is button 'Search'", 'scroll [down4]', "click [7979] where [7979] is link 'BuyItForLife'", "click [10220]…
639	[Action Summary] ['None', "click [65] where [65] is link 'Forums'", 'scroll [down3]', "click [981] where [981] is link 'Next'", 'scroll [down]', "click [1440] where [1440] is link 'iphone — iphone'", "click [2413] where [2413] is link 'Submit'", "type [4049] [Recommendations for used iPhone products ] where [4049] is textbox 'Title *' required: True", "type [4059] [I am looking for recommendation…
640	[Action Summary] ['None', "click [76] where [76] is link 'Submit'", "click [265] where [265] is textbox 'Choose one…' required: False", 'type', 'scroll [down]', "click [333] where [333] is textbox 'Title *' required: True", "type [333] [Virtual Meetup for Book Reading Enthusiasts on March 15th. ] where [333] is textbox 'Title *' focused: True required: True", "click [343] where [343] is textbox '…
641	[Action Summary] ['None', "click [76] where [76] is link 'Submit'", "click [263] where [263] is combobox 'Choose one…' hasPopup: menu required: False expanded: False", 'type', "type [333] [Notice for Harry Potter Virtual Meetup on July 8th ] where [333] is textbox 'Title *' required: True", "type [343] [We are organizing a virtual meetup for Harry Potter enthusiasts on July 8th. All are welcome t…
642	[Action Summary] ['None', "click [76] where [76] is link 'Submit'", "click [263] where [263] is combobox 'Choose one…' hasPopup: menu required: False expanded: False", 'type', "type [333] [Virtual Meetup for Big Little Lies Enthusiasts on Sep 10th ] where [333] is textbox 'Title *' required: True", "type [343] [Join us for a virtual meetup to discuss Big Little Lies on September 10th! ] where [34…
642	[Action Summary] ['None', "click [76] where [76] is link 'Submit'", "click [263] where [263] is combobox 'Choose one…' hasPopup: menu required: False expanded: False", 'type', "type [333] [Virtual Meetup for Big Little Lies Enthusiasts on Sep 10th ] where [333] is textbox 'Title *' required: True", "type [343] [Join us for a virtual meetup to discuss Big Little Lies on September 10th! ] where [34…
643	[Action Summary] ['None', "click [76] where [76] is link 'Submit'", "click [263] where [263] is combobox 'Choose one…' hasPopup: menu required: False expanded: False", 'type', "type [333] [Virtual Meetup for Racing Cars Enthusiasts on Oct 21st ] where [333] is textbox 'Title *' required: True", "type [343] [[Hello Everyone! We're excited to invite you to our virtual meetup on Sunday, October 21st…
644	[Action Summary] ['None', "click [76] where [76] is link 'Submit'", "click [263] where [263] is combobox 'Choose one…' hasPopup: menu required: False expanded: False", 'type', "click [333] where [333] is textbox 'Title *' required: True", "type [333] [Virtual Meetup for Tears of Kingdom Enthusiasts ] where [333] is textbox 'Title *' focused: True required: True", "type [343] [Join us for a virtua…
645	[Action Summary] ['None', "click [76] where [76] is link 'Submit'", "click [263] where [263] is combobox 'Choose one…' hasPopup: menu required: False expanded: False", 'type', "click [333] where [333] is textbox 'Title *' required: True", "type [333] [What could machine learning help the correpong field? ] where [333] is textbox 'Title *' focused: True required: True", "click [343] where [343] is…
646	[Action Summary] ['None', "click [76] where [76] is link 'Submit'", "click [263] where [263] is combobox 'Choose one…' hasPopup: menu required: False expanded: False", 'type', "type [333] [What could Midjourney help the corrugated field? ] where [333] is textbox 'Title *' required: True", "type [343] [What could Midjourney help the corrugated field? ] where [343] is textbox 'Body' required: False…
647	[Action Summary] ['None', "click [76] where [76] is link 'Submit'", "click [263] where [263] is combobox 'Choose one…' hasPopup: menu required: False expanded: False", 'type', "click [333] where [333] is textbox 'Title *' required: True", "type [333] [What could open-source LLMs help the corresponding field ] where [333] is textbox 'Title *' focused: True required: True", "click [343] where [343]…
647	[Action Summary] ['None', "click [76] where [76] is link 'Submit'", "click [263] where [263] is combobox 'Choose one…' hasPopup: menu required: False expanded: False", 'type', "click [333] where [333] is textbox 'Title *' required: True", "type [333] [What could open-source LLMs help the corresponding field ] where [333] is textbox 'Title *' focused: True required: True", "click [343] where [343]…
648	[Action Summary] ['None', "click [76] where [76] is link 'Submit'", "click [263] where [263] is combobox 'Choose one…' hasPopup: menu required: False expanded: False", 'type', "type [333] [What could large language models help the correpong field ] where [333] is textbox 'Title *' required: True", "type [343] [What could large language models help the correpong field ] where [343] is textbox 'Bod…
648	[Action Summary] ['None', "click [76] where [76] is link 'Submit'", "click [263] where [263] is combobox 'Choose one…' hasPopup: menu required: False expanded: False", 'type', "type [333] [What could large language models help the correping field? ] where [333] is textbox 'Title *' required: True", "type [343] [What could large language models help the correpong field? ] where [343] is textbox 'B…
649	[Action Summary] ['None', "click [76] where [76] is link 'Submit'", "click [263] where [263] is combobox 'Choose one…' hasPopup: menu required: False expanded: False", 'type', "click [333] where [333] is textbox 'Title *' required: True", "type [333] [What could diffusion model help the correpong field ] where [333] is textbox 'Title *' focused: True required: True", "click [343] where [343] is t…
650	[Action Summary] ['None', "click [1071] where [1071] is heading 'Friendly reminder bookshop.org exists.'", "click [10433] where [10433] is textbox 'Comment' required: True describedby: reply_to_submission_59421_comment_help", "type [10433] [I am a big fan of the bookorg ] where [10433] is textbox 'Comment' focused: True required: True describedby: reply_to_submission_59421_comment_help", "click […
651	[Action Summary] ['None', 'scroll [down5]', "click [893] where [893] is checkbox 'Hide −' checked: true", 'scroll [up4]', "click [798] where [798] is textbox 'Comment' required: True describedby: reply_to_submission_45899_comment_help", "type [798] [Yeah, pittsburgh traffic, you know... ] where [798] is textbox 'Comment' focused: True required: True describedby: reply_to_submission_45899_comment_…
652	[Action Summary] ['None', "click [120] where [120] is textbox 'Comment' required: True describedby: reply_to_submission_134852_comment_help", "type [120] [??? ] where [120] is textbox 'Comment' focused: True required: True describedby: reply_to_submission_134852_comment_help", "click [133] where [133] is button 'Post'", 'stop []']
658	[Action Summary] ['None', "click [542] where [542] is link 'The A11Y Project / a11yproject.com'", "click [2008] where [2008] is link 'Issues'", "click [4257] where [4257] is link 'New issue'", "type [6557] [401 bad gateway ] where [6557] is textbox 'Title (required)' focused: True required: True", "click [6840] where [6840] is button 'Issue'", "type [6989] [401 bad gateway ] where [6989] is textb…
661	[Action Summary] ['None', "click [1507] where [1507] is textbox 'Search GitLab' required: False", "type [1516] [ChatGPT ] where [1516] is searchbox 'Search GitLab' focused: True describedby: search-input-description", "click [2084] where [2084] is link 'Convex Eggtart / Chatgpt'", "click [2549] where [2549] is link 'Issues'", "click [3952] where [3952] is link 'New issue'", "type [4538] [Connecti…
661	[Action Summary] ['None', "click [1507] where [1507] is textbox 'Search GitLab' required: False", "type [1516] [ChatGPT ] where [1516] is searchbox 'Search GitLab' focused: True describedby: search-input-description", "click [2084] where [2084] is link 'Convex Eggtart / Chatgpt'", "click [2549] where [2549] is link 'Issues'", "click [3952] where [3952] is link 'New issue'", "type [4538] [Connecti…
662	[Action Summary] ['None', "click [1507] where [1507] is textbox 'Search GitLab' required: False", "type [1516] [aem-hacker ] where [1516] is searchbox 'Search GitLab' focused: True describedby: search-input-description", "click [2084] where [2084] is link '0ang3el / aem-hacker'", "click [2622] where [2622] is link 'Issues'", "click [4457] where [4457] is link 'New issue'", 'press [Enter]', "type …
663	[Action Summary] ['None', "click [1507] where [1507] is textbox 'Search GitLab' required: False", "type [1516] [metaseq ] where [1516] is searchbox 'Search GitLab' focused: True describedby: search-input-description", "click [2085] where [2085] is link 'Administrator / metaseq'", "click [2598] where [2598] is link 'Issues'", "click [4507] where [4507] is link 'New issue'", 'press [Enter]', "click…
664	[Action Summary] ['None', "click [1507] where [1507] is textbox 'Search GitLab' required: False", "type [1516] [awesome-python ] where [1516] is searchbox 'Search GitLab' focused: True describedby: search-input-description", "click [2085] where [2085] is link 'Vinta Chen / awesome-python'", "click [4507] where [4507] is link 'Issues'", "click [10349] where [10349] is link 'New issue'", "type [117…
665	[Action Summary] ['None', "click [1507] where [1507] is textbox 'Search GitLab' required: False", "type [1516] [a11y-syntax-highlighting ] where [1516] is searchbox 'Search GitLab' focused: True describedby: search-input-description", "click [2086] where [2086] is link 'Byte Blaze / a11y-syntax-highlighting'", "click [2735] where [2735] is link 'Issues'", "click [4787] where [4787] is link 'Creat…
669	[Action Summary] ['None', "click [470] where [470] is link 'Issues'", "click [1934] where [1934] is link 'New issue'", "type [2774] [Discuss the implementation of dark mode ] where [2774] is textbox 'Title (required)' focused: True required: True", "type [3206] [Dear team, we are considering implementing dark mode in our system. Please share your thoughts and concerns about this change. ] where […
670	[Action Summary] ['None', "click [876] where [876] is link 'Issues'", "click [3537] where [3537] is link 'New issue'", "type [4377] [Discuss implementation of default plugins for .zsh ] where [4377] is textbox 'Title (required)' focused: True required: True", "type [4809] [Please discuss the implementation of default plugins for .zsh ] where [4809] is textbox 'Description' focused: True required:…
679	[Action Summary] ['None', "click [90] where [90] is link '\\ue60b SALES'", "click [283] where [283] is link 'Orders'", 'stop [completed]']
689	[Action Summary] ['None', 'scroll [down3]', "click [1458] where [1458] is link 'Contact Us'", "click [3929] where [3929] is textbox 'Name*' required: True", "type [3929] [Emma Lopez ] where [3929] is textbox 'Name*' focused: True required: True", "click [3935] where [3935] is textbox 'Email*' required: True", "type [3935] [emma.lopez@gmail.com ] where [3935] is textbox 'Email*' focused: True requ…
690	[Action Summary] ['None', 'scroll [down3]', "click [1458] where [1458] is link 'Contact Us'", "type [3935] [emma.lopez@gmail.com ] where [3935] is textbox 'Email*' required: True", "type [3947] [I was told that you would send me a coupon after my last purchase. Please send it to me. Thank you. ] where [3947] is textbox 'What’s on your mind? *' focused: True required: True describedby: comment-err…
690	[Action Summary] ['None', 'scroll [down3]', "click [1458] where [1458] is link 'Contact Us'", "type [3935] [emma.lopez@gmail.com ] where [3935] is textbox 'Email*' required: True", "type [3947] [I was told that you would send me a coupon after my last purchase. Please send it to me. Thank you. ] where [3947] is textbox 'What’s on your mind? *' focused: True required: True describedby: comment-err…
691	[Action Summary] ['None', 'scroll [down3]', "click [1458] where [1458] is link 'Contact Us'", "type [3929] [Emma Lopez ] where [3929] is textbox 'Name*' required: True", "type [3935] [emma.lopez@gmail.com ] where [3935] is textbox 'Email*' required: True", "type [6005] [555-555-5555 ] where [6005] is textbox 'Phone Number' required: False", "type [6012] [I plan to make for a bulk purchase and am …
692	[Action Summary] ['None', 'scroll [down3]', "click [1458] where [1458] is link 'Contact Us'", "type [3929] [Emma Lopez ] where [3929] is textbox 'Name*' required: True", "type [3935] [emma.lopez@gmail.com ] where [3935] is textbox 'Email*' required: True", "type [6005] [555-555-5555 ] where [6005] is textbox 'Phone Number' required: False", "type [6012] [I am a student at University of Phoenix, l…
693	[Action Summary] ['None', 'scroll [down3]', "click [1458] where [1458] is link 'Contact Us'", "click [3929] where [3929] is textbox 'Name*' required: True", "type [3929] [Emma Lopez ] where [3929] is textbox 'Name*' focused: True required: True", "click [3935] where [3935] is textbox 'Email*' required: True", "type [3935] [emma.lopez@gmail.com ] where [3935] is textbox 'Email*' focused: True requ…
705	[Action Summary] ['None', "click [120] where [120] is link '\\ue60a REPORTS'", 'scroll [down]', 'scroll [down]', 'scroll [down]', 'scroll [down]', 'scroll [down]', 'scroll [down]', 'scroll [down]', 'scroll [down]', 'scroll [down]', "click [551] where [551] is link 'Orders'", "click [1305] where [1305] is link '\\ue60a REPORTS'", "click [1899] where [1899] is link 'Orders'", "click [3513] where [3…
706	[Action Summary] ['None', "click [120] where [120] is link '\\ue60a REPORTS'", "click [563] where [563] is link 'Refunds'", 'scroll [down]', "click [2298] where [2298] is combobox 'Period' hasPopup: menu expanded: False", 'press [ArrowDown]', 'press [Enter]', 'scroll [down]', "click [1355] where [1355] is textbox 'From *' required: True", "type [1355] [1/1/23 ] where [1355] is textbox 'From *' re…
706	[Action Summary] ['None', "click [120] where [120] is link '\\ue60a REPORTS'", "click [563] where [563] is link 'Refunds'", 'scroll [down]', "click [2298] where [2298] is combobox 'Period' hasPopup: menu expanded: False", 'press [ArrowDown]', 'press [Enter]', 'scroll [down]', "click [1355] where [1355] is textbox 'From *' required: True", "type [1355] [1/1/23 ] where [1355] is textbox 'From *' re…
709	[Action Summary] ['None', "click [120] where [120] is link '\\ue60a REPORTS'", "click [551] where [551] is link 'Orders'", "click [1580] where [1580] is button 'Show Report'", "type [1358] [5/1/21 ] where [1358] is textbox 'From * This is a required field.' focused: True required: True describedby: sales_report_from-error", "type [1360] [3/31/22 ] where [1360] is textbox 'To * This is a required …
710	[Action Summary] ['None', "click [120] where [120] is link '\\ue60a REPORTS'", 'scroll [down]', "click [560] where [560] is link 'Shipping'", "type [1355] [08/05/2022 ] where [1355] is textbox 'From *' required: True", "type [1357] [03/01/2023 ] where [1357] is textbox 'To *' required: True", "click [1577] where [1577] is button 'Show Report'", 'stop [https://www.magento.com/admin/reports/report_…
711	[Action Summary] ['None', "click [120] where [120] is link '\\ue60a REPORTS'", "click [606] where [606] is link 'Views'", "click [2282] where [2282] is button 'undefined \\ue627'", "click [2668] where [2668] is link '21'", "click [1337] where [1337] is textbox 'To *' required: True", "type [1337] [05/31/2023 ] where [1337] is textbox 'To *' focused: True required: True", "click [1557] where [1557…
713	[Action Summary] ['None', "click [120] where [120] is link '\\ue60a REPORTS'", "click [597] where [597] is link 'Bestsellers'", "click [2302] where [2302] is combobox 'Period' hasPopup: menu expanded: False", 'press [ArrowDown]', 'press [ArrowDown]', 'press [Enter]', "type [1348] [05/01/2022 ] where [1348] is textbox 'From *' required: True", "type [1351] [05/31/2023 ] where [1351] is textbox 'To…
716	[Action Summary] ['None', "click [65] where [65] is link 'Forums'", 'scroll [down3]', "click [592] where [592] is link 'books — books'", "click [1217] where [1217] is button 'Sort by: Hot' hasPopup: menu expanded: False", "click [2999] where [2999] is link 'Top'", "click [3036] where [3036] is button 'From: Past 24 hours' hasPopup: menu expanded: False", "click [3334] where [3334] is link 'All ti…
718	[Action Summary] ['None', "click [20] where [20] is button 'Sort by: Hot' hasPopup: menu expanded: False", "click [256] where [256] is link 'Top'", "click [332] where [332] is link 'Forums'", 'scroll [down]', "click [764] where [764] is link 'technology — technology'", "click [1763] where [1763] is button 'Downvote'", "click [1776] where [1776] is button 'Downvote'", "click [1789] where [1789] is…
719	[Action Summary] ['None', "click [65] where [65] is link 'Forums'", 'scroll [down]', "click [452] where [452] is link 'wallstreetbets — wallstreetbets'", "click [1229] where [1229] is link 'ThetaGang_wsb' expanded: False", "click [3191] where [3191] is link 'Submissions'", "click [3396] where [3396] is button 'Upvote'", "click [3407] where [3407] is button 'Upvote'", 'stop []']
720	[Action Summary] ['None', "click [65] where [65] is link 'Forums'", 'scroll [down3]', "click [981] where [981] is link 'Next'", 'scroll [down3]', "click [1939] where [1939] is link 'Next'", 'scroll [down3]', "click [2897] where [2897] is link 'Next'", 'scroll [down3]', "click [3745] where [3745] is button 'Next' disabled: True", "click [3740] where [3740] is link 'Previous'", "click [4079] where …
726	[Action Summary] ['None', "click [65] where [65] is link 'Forums'", 'scroll [down3]', "click [981] where [981] is link 'Next'", 'scroll [down3]', "click [1939] where [1939] is link 'Next'", "click [2308] where [2308] is link 'EarthPorn — EarthPorn'", "click [3369] where [3369] is searchbox 'Search query'", "type [3369] [jacyanthis ] where [3369] is searchbox 'Search query' focused: True", 'stop […
731	[Action Summary] ['None', "click [12] where [12] is button 'MarvelsGrantMan136' hasPopup: menu expanded: False", "click [181] where [181] is link 'Submissions'", "click [476] where [476] is link 'Submissions'", "click [548] where [548] is button 'MarvelsGrantMan136' hasPopup: menu expanded: False", "click [797] where [797] is link ' Profile'", "click [1526] where [1526] is link 'Submissions'", 's…
733	[Action Summary] ['None', "click [12] where [12] is button 'MarvelsGrantMan136' hasPopup: menu expanded: False", "click [249] where [249] is link ' Profile'", "click [987] where [987] is link 'Submissions'", "click [3704] where [3704] is link 'Edit'", "type [4544] [Every watch makes me feel like a kid again ] where [4544] is textbox 'Body' required: False describedby: submission_body_help", "type…
734	[Action Summary] ['None', "click [12] where [12] is button 'MarvelsGrantMan136' hasPopup: menu expanded: False", "click [249] where [249] is link ' Profile'", "click [990] where [990] is link 'Submissions'", 'scroll [down2]', "click [3483] where [3483] is link '‘Ted Lasso’ Season 3 Premiere Scores 870K U.S. Households, Up 59% From Season 2 Premiere'", "click [4149] where [4149] is link 'Edit'", "…
735	[Action Summary] ['None', "click [12] where [12] is button 'MarvelsGrantMan136' hasPopup: menu expanded: False", "click [249] where [249] is link ' Profile'", "click [990] where [990] is link 'Submissions'", 'scroll [down3]', "click [3549] where [3549] is link '‘Lord of the Rings: The Rings of Power’ Season 2 Cast Adds Ciaràn Hinds, Rory Kinnear and Tanya Moodie'", "click [4227] where [4227] is l…
735	[Action Summary] ['None', "click [12] where [12] is button 'MarvelsGrantMan136' hasPopup: menu expanded: False", "click [249] where [249] is link ' Profile'", "click [990] where [990] is link 'Submissions'", 'scroll [down3]', "click [3549] where [3549] is link '‘Lord of the Rings: The Rings of Power’ Season 2 Cast Adds Ciaràn Hinds, Rory Kinnear and Tanya Moodie'", "click [4227] where [4227] is l…
744	[Action Summary] ['None', "click [305] where [305] is link 'New project'", "click [1653] where [1653] is link 'Create blank project Create a blank project to store your files, plan your work, and collaborate on code, among other things.'", "type [3108] [AutoAGI ] where [3108] is textbox 'Project name' required: True", "click [3649] where [3649] is link 'Project information'", "click [5976] where …
757	[Action Summary] ['None', "click [482] where [482] is link 'Find directions between two points'", "type [522] [Pittsburgh, Pennsylvania ] where [522] is textbox 'From' required: False", "type [514] [Washington, D.C. ] where [514] is textbox 'To' required: False", 'stop [Distance: 599km. Time: 7:21.]']
763	[Action Summary] ['None', "click [35] where [35] is textbox 'Search' focused: True required: False", "type [35] [Trader Joe's Pittsburgh ] where [35] is textbox 'Search' focused: True required: False", "click [573] where [573] is link 'More results'", 'click [576] where [576] is link "Trader Joe\'s, 6343, Penn Avenue, East Liberty, Pittsburgh, Allegheny County, 15206, United States"', "click [482…
772	[Action Summary] ['None', "click [108] where [108] is link '\\ue609 MARKETING'", "click [431] where [431] is link 'All Reviews'", "click [2169] where [2169] is button 'Reset Filter'", "type [4393] [Circe Fleece ] where [4393] is textbox '' required: False", "stop [n/a, there's no item matching the requirement]"]
784	[Action Summary] ['None', "click [442] where [442] is link 'CI/CD'", "click [2798] where [2798] is tab 'Branches' selected: False controls: __BVID__498", 'press [Enter]', "click [2802] where [2802] is textbox 'Filter pipelines' required: False", "type [2802] [main ] where [2802] is textbox 'Search' focused: True required: False", "click [2597] where [2597] is button 'Show Pipeline ID' hasPopup: m…
785	[Action Summary] ['None', "click [436] where [436] is link 'Repository'", "click [3596] where [3596] is link 'Branches'", "click [5305] where [5305] is link 'Branches'", "click [6510] where [6510] is link 'Commits'", 'press [Enter]', "click [7603] where [7603] is button 'development' hasPopup: menu expanded: False", 'press [Enter]', "click [10578] where [10578] is menuitem 'gh-pages'", 'press [En…
790	[Action Summary] ['None', "click [108] where [108] is link '\\ue609 MARKETING'", "click [431] where [431] is link 'All Reviews'", "click [2169] where [2169] is button 'Reset Filter'", "type [4393] [Sybil running short ] where [4393] is textbox '' required: False", 'stop [Given the absence of negative reviews to delete, all steps in the detailed instruction have been completed.]']
790	[Action Summary] ['None', "click [108] where [108] is link '\\ue609 MARKETING'", "click [431] where [431] is link 'All Reviews'", "click [2169] where [2169] is button 'Reset Filter'", "type [4393] [Sybil running short ] where [4393] is textbox '' required: False", 'stop [Given the absence of negative reviews to delete, all steps in the detailed instruction have been completed.]']
805	[Action Summary] ['None', "click [493] where [493] is link 'Repository'", "click [3982] where [3982] is link 'Branches'", 'press [Enter]', "click [5727] where [5727] is link 'Merge request'", 'press [Enter]', "click [6511] where [6511] is link 'Change branches'", "click [8020] where [8020] is button 'redesign'", 'scroll [down]', 'scroll [down]', 'scroll [down]', 'scroll [down]', 'scroll [down]', …
808	[Action Summary] ['None', "click [618] where [618] is link 'Byte Blaze / cloud-to-butt'", "click [1987] where [1987] is link 'Issues'", "click [3524] where [3524] is link 'New issue'", 'press [Enter]', "type [4364] [Let's keep the project alive ] where [4364] is textbox 'Title (required)' required: True", "click [4647] where [4647] is button 'Issue'", "click [5793] where [5793] is link ' Issue'",…
